# Supplementary material for: Examining the use of evidence-based and social media supported tools in freely accessible physical activity intervention websites
Source: PubMed Central journal article supplement (PMC4158049; doi:10.1186/s12966-014-0105-0), 2014-08-17
Supplement: 12966_2014_105_MOESM1_ESM.pdf [file 12966_2014_105_MOESM1_ESM.pdf]

Appendix 1: Full list of web-addresses (n = 750) retrieved as a result of the search strategy.

| Search term       | Page rank | Web-address                                                                                                                                                                                                                                                                   | Website category                        |
|-------------------|-----------|-------------------------------------------------------------------------------------------------------------------------------------------------------------------------------------------------------------------------------------------------------------------------------|-----------------------------------------|
| Exercise Tracking | 1         | <a href="http://lifelifehacker.com/5257812/six-best-exercise-planning-and-tracking-tools">http://lifelifehacker.com/5257812/six-best-exercise-planning-and-tracking-tools</a>                                                                                                 | Links to Online Health Program          |
|                   | 2         | <a href="http://singularityhub.com/2012/10/15/the-fitbit-zip-a-60-exercise-tracking-clipon-that-automatically-syncs-to-your-devices/">http://singularityhub.com/2012/10/15/the-fitbit-zip-a-60-exercise-tracking-clipon-that-automatically-syncs-to-your-devices/</a>         | Links to Online Health Program          |
|                   | 3         | <a href="http://www.myfitnesspal.com/">http://www.myfitnesspal.com/</a>                                                                                                                                                                                                       | Physical activity Online Health program |
|                   | 4         | <a href="http://www.lifelifehacker.com.au/2009/05/five-best-exercise-planning-and-tracking-tools/">http://www.lifelifehacker.com.au/2009/05/five-best-exercise-planning-and-tracking-tools/</a>                                                                               | Links to Online Health Program          |
|                   | 5         | <a href="http://www.justwalk.com/">http://www.justwalk.com/</a>                                                                                                                                                                                                               | Physical activity Online Health program |
|                   | 6         | <a href="http://www.fitwatch.com/diary/activitydiary.html">http://www.fitwatch.com/diary/activitydiary.html</a>                                                                                                                                                               | Physical activity Online Health program |
|                   | 7         | <a href="http://www.skimble.com/">http://www.skimble.com/</a>                                                                                                                                                                                                                 | App                                     |
|                   | 8         | <a href="http://www.gymheroapp.com/">http://www.gymheroapp.com/</a>                                                                                                                                                                                                           | App                                     |
|                   | 9         | <a href="http://www.fitday.com/">http://www.fitday.com/</a>                                                                                                                                                                                                                   | Non PA Online Health Program            |
|                   | 10        | <a href="http://www.appszoom.com/android_applications/exercise+tracking">http://www.appszoom.com/android_applications/exercise+tracking</a>                                                                                                                                   | App                                     |
|                   | 11        | <a href="http://www.livestrong.com/article/383967-diet-and-exercise-tracking/">http://www.livestrong.com/article/383967-diet-and-exercise-tracking/</a>                                                                                                                       | Physical activity Online Health program |
|                   | 12        | <a href="http://dailyburn.com/">http://dailyburn.com/</a>                                                                                                                                                                                                                     | Physical activity Online Health program |
|                   | 13        | <a href="https://itunes.apple.com/us/app/jefit-workout-fitness-bodybuilding/id449810000?mt=8">https://itunes.apple.com/us/app/jefit-workout-fitness-bodybuilding/id449810000?mt=8</a>                                                                                         | App                                     |
|                   | 14        | <a href="http://www.onlinefitnesslog.com/">http://www.onlinefitnesslog.com/</a>                                                                                                                                                                                               | Physical activity Online Health program |
|                   | 15        | <a href="http://faboh.com/ets/">http://faboh.com/ets/</a>                                                                                                                                                                                                                     | Business level online health program    |
|                   | 16        | <a href="http://area.autodesk.com/flame-tutorials-legacy/exercise_tracking_camera_motion-4">http://area.autodesk.com/flame-tutorials-legacy/exercise_tracking_camera_motion-4</a>                                                                                             | Other                                   |
|                   | 17        | <a href="http://support.loseit.com/customer/portal/questions/628929-exercise-tracking">http://support.loseit.com/customer/portal/questions/628929-exercise-tracking</a>                                                                                                       | NGO health information                  |
|                   | 18        | <a href="http://blog.visual.ly/visualizing-fitness-data/">http://blog.visual.ly/visualizing-fitness-data/</a>                                                                                                                                                                 | Links to Online Health Program          |
|                   | 19        | <a href="http://lifelifehacker.com/5907870/five-best-fitness-tracking-appliances">http://lifelifehacker.com/5907870/five-best-fitness-tracking-appliances</a>                                                                                                                 | Links to Online Health Program          |
|                   | 20        | <a href="http://www.startwalkingnow.org/mystart_tracker.jsp">http://www.startwalkingnow.org/mystart_tracker.jsp</a>                                                                                                                                                           | Government health information           |
|                   | 21        | <a href="http://physiqueapp.com/">http://physiqueapp.com/</a>                                                                                                                                                                                                                 | App                                     |
|                   | 22        | <a href="http://www.washingtonpost.com/blogs/the-checkup/post/usdas-new-diet-and-exercise-tracking-tool/2010/12/20/gIQArlHI9IP_blog.html">http://www.washingtonpost.com/blogs/the-checkup/post/usdas-new-diet-and-exercise-tracking-tool/2010/12/20/gIQArlHI9IP_blog.html</a> | Links to Online Health Program          |
|                   | 23        | <a href="http://www.nytimes.com/2012/07/29/technology/nike-fuelband-tracks-physical-activity-inconsistently.html">http://www.nytimes.com/2012/07/29/technology/nike-fuelband-tracks-physical-activity-inconsistently.html</a>                                                 | Links to Online Health Program          |
|                   | 24        | <a href="http://blog.withings.com/en/2012/10/04/mynetdiary-and-withings-partner-for-calorie-and-exercise-tracking/">http://blog.withings.com/en/2012/10/04/mynetdiary-and-withings-partner-for-calorie-and-exercise-tracking/</a>                                             | Online Health program                   |
|                   | 25        | <a href="http://www.noom.com/tracking/">http://www.noom.com/tracking/</a>                                                                                                                                                                                                     | App                                     |
|                   | 26        | <a href="http://allaboutwindowsphone.com/flow/item/15404_ProAktivo_provides_m">http://allaboutwindowsphone.com/flow/item/15404_ProAktivo_provides_m</a>                                                                                                                       | Links to Online Health Program          |

|    |  |                                                                                                                                                                                               |                                |
|----|--|-----------------------------------------------------------------------------------------------------------------------------------------------------------------------------------------------|--------------------------------|
|    |  | <a href="#">obile_cent.php</a>                                                                                                                                                                |                                |
| 27 |  | <a href="http://www.hokiewellness.hr.vt.edu/PhysicalHealth/ExerciseFitness/ExerciseTracking.aspx">http://www.hokiewellness.hr.vt.edu/PhysicalHealth/ExerciseFitness/ExerciseTracking.aspx</a> | Links to Online Health Program |
| 28 |  | <a href="http://dailytekk.com/2012/06/11/fitness-tracking-devices/">http://dailytekk.com/2012/06/11/fitness-tracking-devices/</a>                                                             | Links to Online Health Program |
| 29 |  | <a href="https://itunes.apple.com/us/app/workout-log-fitness-exercise/id396267216?mt=8">https://itunes.apple.com/us/app/workout-log-fitness-exercise/id396267216?mt=8</a>                     | App                            |
| 30 |  | <a href="http://www.148apps.com/news/favorite-apps-track-exercise/">http://www.148apps.com/news/favorite-apps-track-exercise/</a>                                                             | App                            |

|                  |    |                                                                                                                                                                                                                         |                                         |
|------------------|----|-------------------------------------------------------------------------------------------------------------------------------------------------------------------------------------------------------------------------|-----------------------------------------|
| Exercise tracker | 1  | <a href="http://www.myfitnesspal.com/">http://www.myfitnesspal.com/</a>                                                                                                                                                 | Physical activity Online Health program |
|                  | 2  | <a href="http://lifelifehacker.com/5257812/six-best-exercise-planning-and-tracking-tools">http://lifelifehacker.com/5257812/six-best-exercise-planning-and-tracking-tools</a>                                           | Links to Online Health Program          |
|                  | 3  | <a href="http://www.fitwatch.com/diary/activitydiary.html">http://www.fitwatch.com/diary/activitydiary.html</a>                                                                                                         | Physical activity Online Health program |
|                  | 4  | <a href="http://www.mynetdiary.com/">http://www.mynetdiary.com/</a>                                                                                                                                                     | Physical activity Online Health program |
|                  | 5  | <a href="http://www.fitday.com/">http://www.fitday.com/</a>                                                                                                                                                             | Non PA Online Health Program            |
|                  | 6  | <a href="http://www.webmd.com/diet/food-fitness-planner/default.htm">http://www.webmd.com/diet/food-fitness-planner/default.htm</a>                                                                                     | Physical activity Online Health program |
|                  | 7  | <a href="https://itunes.apple.com/au/app/exercise-tracker/id293603711?mt=8">https://itunes.apple.com/au/app/exercise-tracker/id293603711?mt=8</a>                                                                       | App                                     |
|                  | 8  | <a href="http://download.cnet.com/MedHelp-s-Exercise-Tracker/3000-2056_4-10909577.html">http://download.cnet.com/MedHelp-s-Exercise-Tracker/3000-2056_4-10909577.html</a>                                               | Links to Online Health Program          |
|                  | 9  | <a href="http://www.wired.com/playbook/2012/08/fitness-trackers/">http://www.wired.com/playbook/2012/08/fitness-trackers/</a>                                                                                           | Links to Online Health Program          |
|                  | 10 | <a href="http://www.medhelp.org/land/exercise-tracker">http://www.medhelp.org/land/exercise-tracker</a>                                                                                                                 | Physical activity Online Health program |
|                  | 11 | <a href="http://www.healthehuman.com/features/exercise-workout-tracker">http://www.healthehuman.com/features/exercise-workout-tracker</a>                                                                               | Physical activity Online Health program |
|                  | 12 | <a href="http://www.webfitnesstools.com/">http://www.webfitnesstools.com/</a>                                                                                                                                           | Physical activity Online Health program |
|                  | 13 | <a href="http://www.livestrong.com/article/362134-diet-exercise-trackers/">http://www.livestrong.com/article/362134-diet-exercise-trackers/</a>                                                                         | Physical activity Online Health program |
|                  | 14 | <a href="http://appworld.blackberry.com/webstore/content/27743/?lang=en">http://appworld.blackberry.com/webstore/content/27743/?lang=en</a>                                                                             | App                                     |
|                  | 15 | <a href="http://fittracker.shapefit.com/">http://fittracker.shapefit.com/</a>                                                                                                                                           | Physical activity Online Health program |
|                  | 16 | <a href="http://www.gymheroapp.com/">http://www.gymheroapp.com/</a>                                                                                                                                                     | App                                     |
|                  | 17 | <a href="http://apps.facebook.com/fit-ify/">http://apps.facebook.com/fit-ify/</a>                                                                                                                                       | Other                                   |
|                  | 18 | <a href="http://faboh.com/ets/">http://faboh.com/ets/</a>                                                                                                                                                               | Business level online health program    |
|                  | 19 | <a href="https://itunes.apple.com/us/app/fitocracy-free-daily-workout/id509253726?mt=8">https://itunes.apple.com/us/app/fitocracy-free-daily-workout/id509253726?mt=8</a>                                               | App                                     |
|                  | 20 | <a href="http://dailyburn.com/">http://dailyburn.com/</a>                                                                                                                                                               | Physical activity Online Health program |
|                  | 21 | <a href="http://www.startwalkingnow.org/">http://www.startwalkingnow.org/</a>                                                                                                                                           | Government health information           |
|                  | 22 | <a href="http://www.flawlesspt.com.au/index.php?option=com_content&amp;view=article&amp;id=217&amp;Itemid=110">http://www.flawlesspt.com.au/index.php?option=com_content&amp;view=article&amp;id=217&amp;Itemid=110</a> | Physical activity Online Health program |
|                  | 23 | <a href="https://play.google.com/store/apps/details?id=com.gymrat&amp;hl=en">https://play.google.com/store/apps/details?id=com.gymrat&amp;hl=en</a>                                                                     | App                                     |
|                  | 24 | <a href="http://healthland.time.com/2012/12/04/top-10-health-lists/slide/workout-tracker/">http://healthland.time.com/2012/12/04/top-10-health-lists/slide/workout-tracker/</a>                                         | Links to Online Health Program          |
|                  | 25 | <a href="https://www.getfittn.com/">https://www.getfittn.com/</a>                                                                                                                                                       | Government health information           |

|  |    |                                                                                                                                                                                                                 |                                         |
|--|----|-----------------------------------------------------------------------------------------------------------------------------------------------------------------------------------------------------------------|-----------------------------------------|
|  | 26 | <a href="http://www.logyourrun.com/runninglog/">http://www.logyourrun.com/runninglog/</a>                                                                                                                       | Physical activity Online Health program |
|  | 27 | <a href="http://www.dairycouncilofca.org/Tools/TeenBeat/">http://www.dairycouncilofca.org/Tools/TeenBeat/</a>                                                                                                   | Non PA Online Health Program            |
|  | 28 | <a href="http://www.skimble.com/">http://www.skimble.com/</a>                                                                                                                                                   | App                                     |
|  | 29 | <a href="https://itunes.apple.com/us/app/jefit-workout-fitness-bodybuilding/id449810000?mt=8">https://itunes.apple.com/us/app/jefit-workout-fitness-bodybuilding/id449810000?mt=8</a>                           | App                                     |
|  | 30 | <a href="http://blackberry-applications.toptenreviews.com/health-and-fitness/exercise-tracker-review.html">http://blackberry-applications.toptenreviews.com/health-and-fitness/exercise-tracker-review.html</a> | Links to Online Health Program          |

|                   |    |                                                                                                                                                                                                               |                                         |
|-------------------|----|---------------------------------------------------------------------------------------------------------------------------------------------------------------------------------------------------------------|-----------------------------------------|
| Track my exercise | 1  | <a href="http://www.mapmyfitness.com/">http://www.mapmyfitness.com/</a>                                                                                                                                       | Physical activity Online Health program |
|                   | 2  | <a href="http://www.myfitnessjournal.com/">http://www.myfitnessjournal.com/</a>                                                                                                                               | Physical activity Online Health program |
|                   | 3  | <a href="http://www.justwalk.com/">http://www.justwalk.com/</a>                                                                                                                                               | Physical activity Online Health program |
|                   | 4  | <a href="http://www.myfitnesspal.com/">http://www.myfitnesspal.com/</a>                                                                                                                                       | Physical activity Online Health program |
|                   | 5  | <a href="http://lifehacker.com/5257812/six-best-exercise-planning-and-tracking-tools">http://lifehacker.com/5257812/six-best-exercise-planning-and-tracking-tools</a>                                         | Links to Online Health Program          |
|                   | 6  | <a href="http://www.makeuseof.com/dir/fitnesstracker-track-daily-exercise/">http://www.makeuseof.com/dir/fitnesstracker-track-daily-exercise/</a>                                                             | Links to Online Health Program          |
|                   | 7  | <a href="http://fit.webmd.com/kids/move/article/track-your-exercise">http://fit.webmd.com/kids/move/article/track-your-exercise</a>                                                                           | Physical activity Online Health program |
|                   | 8  | <a href="http://www.webmd.com/diet/food-fitness-planner/default.htm">http://www.webmd.com/diet/food-fitness-planner/default.htm</a>                                                                           | Physical activity Online Health program |
|                   | 9  | <a href="https://www.exercise.com/article/why-you-should-track-your-exercise">https://www.exercise.com/article/why-you-should-track-your-exercise</a>                                                         | NGO health information                  |
|                   | 10 | <a href="http://www.skimble.com/">http://www.skimble.com/</a>                                                                                                                                                 | App                                     |
|                   | 11 | <a href="http://exercise.lbl.gov/">http://exercise.lbl.gov/</a>                                                                                                                                               | Government health information           |
|                   | 12 | <a href="http://www.fitday.com/">http://www.fitday.com/</a>                                                                                                                                                   | Physical activity Online Health program |
|                   | 13 | <a href="https://itunes.apple.com/us/app/jefit-workout-fitness-bodybuilding/id449810000?mt=8">https://itunes.apple.com/us/app/jefit-workout-fitness-bodybuilding/id449810000?mt=8</a>                         | App                                     |
|                   | 14 | <a href="http://www.bodybuilding.com/fun/printworklog.htm">http://www.bodybuilding.com/fun/printworklog.htm</a>                                                                                               | Physical activity Online Health program |
|                   | 15 | <a href="http://www.sparkpeople.com/community/help_answer.asp?id=27">http://www.sparkpeople.com/community/help_answer.asp?id=27</a>                                                                           | Physical activity Online Health program |
|                   | 16 | <a href="http://www.simplefitnesssolutions.com/articles/staying_on_track.htm">http://www.simplefitnesssolutions.com/articles/staying_on_track.htm</a>                                                         | NGO health information                  |
|                   | 17 | <a href="http://lifehacker.com/5925850/google-tracks-20-turns-your-exercise-trips-into-eye-catching-data">http://lifehacker.com/5925850/google-tracks-20-turns-your-exercise-trips-into-eye-catching-data</a> | Links to Online Health Program          |
|                   | 18 | <a href="http://stopandbreathe.com/2011/03/19/strategies-to-get-your-exercise-program-back-on-track/">http://stopandbreathe.com/2011/03/19/strategies-to-get-your-exercise-program-back-on-track/</a>         | NGO health information                  |
|                   | 19 | <a href="http://dailyburn.com/">http://dailyburn.com/</a>                                                                                                                                                     | Physical activity Online Health program |
|                   | 20 | <a href="http://www.womenshealthmag.com/fitness/outdoor-workouts-1">http://www.womenshealthmag.com/fitness/outdoor-workouts-1</a>                                                                             | Links to Online Health Program          |
|                   | 21 | <a href="http://seanmullen.com/2012/07/13/tech-for-tracking-your-exercise-goals/">http://seanmullen.com/2012/07/13/tech-for-tracking-your-exercise-goals/</a>                                                 | Links to Online Health Program          |
|                   | 22 | <a href="http://www.myexerciseplan.com/">http://www.myexerciseplan.com/</a>                                                                                                                                   | Physical activity Online Health program |
|                   | 23 | <a href="https://www.trackmytraining.co.uk/">https://www.trackmytraining.co.uk/</a>                                                                                                                           | Physical activity Online Health program |
|                   | 24 | <a href="http://go4life.nia.nih.gov/mygo4life/find-my-exercise-plans">http://go4life.nia.nih.gov/mygo4life/find-my-exercise-plans</a>                                                                         | Dead Link                               |
|                   | 25 | <a href="https://www.ifit.com/">https://www.ifit.com/</a>                                                                                                                                                     | Physical activity Online Health program |
|                   | 26 | <a href="http://www.shapefit.com/fittracker-exercise-journals.html">http://www.shapefit.com/fittracker-exercise-journals.html</a>                                                                             | Physical activity Online Health program |

|  |    |                                                                                                                                                                                             |                               |
|--|----|---------------------------------------------------------------------------------------------------------------------------------------------------------------------------------------------|-------------------------------|
|  | 27 | <a href="http://www.webmd.com/fitness-exercise/features/the-truth-about-heart-rate-and-exercise">http://www.webmd.com/fitness-exercise/features/the-truth-about-heart-rate-and-exercise</a> | NGO health information        |
|  | 28 | <a href="http://www.betterhealth.vic.gov.au/bhcv2/bhcarticles.nsf/pages/Exercise_intensity">http://www.betterhealth.vic.gov.au/bhcv2/bhcarticles.nsf/pages/Exercise_intensity</a>           | Government health information |
|  | 29 | <a href="http://www.dailymile.com/">http://www.dailymile.com/</a>                                                                                                                           | App                           |
|  | 30 | <a href="http://www.gymheroapp.com/">www.gymheroapp.com/</a>                                                                                                                                | App                           |

|                       |    |                                                                                                                                                                                                                                                       |                                         |
|-----------------------|----|-------------------------------------------------------------------------------------------------------------------------------------------------------------------------------------------------------------------------------------------------------|-----------------------------------------|
| Free exercise program | 1  | <a href="http://www.workoutbox.com/workouts/">http://www.workoutbox.com/workouts/</a>                                                                                                                                                                 | Physical activity Online Health program |
|                       | 2  | <a href="http://www.freetrainers.com/">http://www.freetrainers.com/</a>                                                                                                                                                                               | Physical activity Online Health program |
|                       | 3  | <a href="http://www.whyexercise.com/free-exercise-program.html">http://www.whyexercise.com/free-exercise-program.html</a>                                                                                                                             | Physical activity Online Health program |
|                       | 4  | <a href="http://exercise.about.com/cs/weightloss/a/12weeks.htm">http://exercise.about.com/cs/weightloss/a/12weeks.htm</a>                                                                                                                             | Links to Online Health Program          |
|                       | 5  | <a href="http://www.muscleandstrength.com/workouts/main.html">http://www.muscleandstrength.com/workouts/main.html</a>                                                                                                                                 | Physical activity Online Health program |
|                       | 6  | <a href="http://www.noexcusesworkouts.com/free-exercise-programs-menu/">http://www.noexcusesworkouts.com/free-exercise-programs-menu/</a>                                                                                                             | Links to Online Health Program          |
|                       | 7  | <a href="http://www.acefitness.org/workouts/">http://www.acefitness.org/workouts/</a>                                                                                                                                                                 | Links to Online Health Program          |
|                       | 8  | <a href="http://www.cairnsesplanade.com.au/Active%20Living%20-%20Fun%20Free%20Fitness">http://www.cairnsesplanade.com.au/Active%20Living%20-%20Fun%20Free%20Fitness</a>                                                                               | Other                                   |
|                       | 9  | <a href="http://www.livestrong.com/free-fitness-programs/">http://www.livestrong.com/free-fitness-programs/</a>                                                                                                                                       | Links to Online Health Program          |
|                       | 10 | <a href="http://www.workoutz.com/">http://www.workoutz.com/</a>                                                                                                                                                                                       | Links to Online Health Program          |
|                       | 11 | <a href="http://www.myfreetrainer.com/">http://www.myfreetrainer.com/</a>                                                                                                                                                                             | Links to Online Health Program          |
|                       | 12 | <a href="http://www.marieclaire.com/health-fitness/news/power-up-workout-plan-week-1">http://www.marieclaire.com/health-fitness/news/power-up-workout-plan-week-1</a>                                                                                 | Media Article                           |
|                       | 13 | <a href="http://www.makeuseof.com/tag/3-great-online-fitness-programs-shape/">http://www.makeuseof.com/tag/3-great-online-fitness-programs-shape/</a>                                                                                                 | Links to Online Health Program          |
|                       | 14 | <a href="http://www.fitness.com/exercises/">http://www.fitness.com/exercises/</a>                                                                                                                                                                     | Links to Online Health Program          |
|                       | 15 | <a href="http://www.fitsync.com/">http://www.fitsync.com/</a>                                                                                                                                                                                         | Links to Online Health Program          |
|                       | 16 | <a href="http://www.bodyfitcheck.com.au/">http://www.bodyfitcheck.com.au/</a>                                                                                                                                                                         | Physical activity Online Health program |
|                       | 17 | <a href="http://www.noexcusesworkouts.com/">http://www.noexcusesworkouts.com/</a>                                                                                                                                                                     | Physical activity Online Health program |
|                       | 18 | <a href="http://download.cnet.com/windows/health-and-fitness-software/">http://download.cnet.com/windows/health-and-fitness-software/</a>                                                                                                             | Links to Online Health Program          |
|                       | 19 | <a href="http://www.myhomepersonaltrainer.com/">http://www.myhomepersonaltrainer.com/</a>                                                                                                                                                             | Physical activity Online Health program |
|                       | 20 | <a href="http://www.ironworkout.com/workout_programs/index.htm">http://www.ironworkout.com/workout_programs/index.htm</a>                                                                                                                             | Physical activity Online Health program |
|                       | 21 | <a href="http://www.fitday.com/fitness-articles/fitness/weight-loss/lose-15-pounds-in-1-month-free-sample-exercise-plan.html">http://www.fitday.com/fitness-articles/fitness/weight-loss/lose-15-pounds-in-1-month-free-sample-exercise-plan.html</a> | Physical activity Online Health program |
|                       | 22 | <a href="http://fitbie.msn.com/slideshow/3-gym-free-workout-plans">http://fitbie.msn.com/slideshow/3-gym-free-workout-plans</a>                                                                                                                       | Physical activity Online Health program |
|                       | 23 | <a href="http://www.gosnells.wa.gov.au/scripts/viewarticle.asp?NID=25641">http://www.gosnells.wa.gov.au/scripts/viewarticle.asp?NID=25641</a>                                                                                                         | Dead link                               |
|                       | 24 | <a href="http://scoobysworkshop.com/custom-workout-plans/">http://scoobysworkshop.com/custom-workout-plans/</a>                                                                                                                                       | Physical activity Online Health program |
|                       | 25 | <a href="http://www.nowloss.com/free-weight-loss-workout-exercise-program.htm">http://www.nowloss.com/free-weight-loss-workout-exercise-program.htm</a>                                                                                               | Physical activity Online Health program |
|                       | 26 | <a href="http://au.lifestyle.yahoo.com/womens-health/fitness/speedy-workouts/">http://au.lifestyle.yahoo.com/womens-health/fitness/speedy-workouts/</a>                                                                                               | Physical activity Online Health program |
|                       | 27 | <a href="http://exercise.lifetips.com/cat/6003/exercise-plans/index.html">http://exercise.lifetips.com/cat/6003/exercise-plans/index.html</a>                                                                                                         | Links to Online Health Program          |

|  |    |                                                                                                                                   |                                         |
|--|----|-----------------------------------------------------------------------------------------------------------------------------------|-----------------------------------------|
|  | 28 | <a href="http://www.personaltrainingprograms.com/">http://www.personaltrainingprograms.com/</a>                                   | Physical activity Online Health program |
|  | 29 | <a href="http://www.darebin.vic.gov.au/Page/Page.aspx?Page_Id=9515">http://www.darebin.vic.gov.au/Page/Page.aspx?Page_Id=9515</a> | Other                                   |
|  | 30 | <a href="http://www.oobafit.com/">http://www.oobafit.com/</a>                                                                     | Physical activity Online Health program |

|                        |    |                                                                                                                                                                                                                                                                                                                                         |                                         |
|------------------------|----|-----------------------------------------------------------------------------------------------------------------------------------------------------------------------------------------------------------------------------------------------------------------------------------------------------------------------------------------|-----------------------------------------|
| Health tracking online | 1  | <a href="http://www.preventionhealthtracker.com.au/">http://www.preventionhealthtracker.com.au/</a>                                                                                                                                                                                                                                     | Physical activity Online Health program |
|                        | 2  | <a href="http://online.wsj.com/article/SB10001424052702304180804575188402688763416.html">http://online.wsj.com/article/SB10001424052702304180804575188402688763416.html</a>                                                                                                                                                             | Media Article                           |
|                        | 3  | <a href="http://www.healthehuman.com/">http://www.healthehuman.com/</a>                                                                                                                                                                                                                                                                 | Physical activity Online Health program |
|                        | 4  | <a href="http://thecarrot.com/">http://thecarrot.com/</a>                                                                                                                                                                                                                                                                               | Physical activity Online Health program |
|                        | 5  | <a href="http://greatist.com/health/complete-guide-to-tracking-health-and-fitness-online/">http://greatist.com/health/complete-guide-to-tracking-health-and-fitness-online/</a>                                                                                                                                                         | Media Article                           |
|                        | 6  | <a href="http://mashable.com/2011/09/23/the-complete-guide-to-tracking-health-fitness-online-infographic/">http://mashable.com/2011/09/23/the-complete-guide-to-tracking-health-fitness-online-infographic/</a>                                                                                                                         | Media Article                           |
|                        | 7  | <a href="http://lifeboat.com/blog/2009/01/the-new-rise-of-online-health-tracking">http://lifeboat.com/blog/2009/01/the-new-rise-of-online-health-tracking</a>                                                                                                                                                                           | Media Article                           |
|                        | 8  | <a href="https://myupmc.upmc.com/">https://myupmc.upmc.com/</a>                                                                                                                                                                                                                                                                         | Other                                   |
|                        | 9  | <a href="http://www.healthunlocked.com/health-tracking/">http://www.healthunlocked.com/health-tracking/</a>                                                                                                                                                                                                                             | Profile page                            |
|                        | 10 | <a href="http://lifelifehacker.com/5841439/five-best-fitness-tracking-web-sites-and-services">http://lifelifehacker.com/5841439/five-best-fitness-tracking-web-sites-and-services</a>                                                                                                                                                   | Links to Online Health Program          |
|                        | 11 | <a href="http://www.thehealthcaregroup.com.au/pages/corporate/services/online-health-tracking-program.php">http://www.thehealthcaregroup.com.au/pages/corporate/services/online-health-tracking-program.php</a>                                                                                                                         | Profile page                            |
|                        | 12 | <a href="http://www.icpsr.umich.edu/icpsrweb/ICPSR/series/161">http://www.icpsr.umich.edu/icpsrweb/ICPSR/series/161</a>                                                                                                                                                                                                                 | NGO health information                  |
|                        | 13 | <a href="http://ephtracking.cdc.gov/">http://ephtracking.cdc.gov/</a>                                                                                                                                                                                                                                                                   | Other                                   |
|                        | 14 | <a href="http://www.governmenttechnology.co.uk/gt-news/item/2519-uks-first-online-health-tracker-launched">http://www.governmenttechnology.co.uk/gt-news/item/2519-uks-first-online-health-tracker-launched</a>                                                                                                                         | Media Article                           |
|                        | 15 | <a href="http://health.adelaide.edu.au/tracking/">http://health.adelaide.edu.au/tracking/</a>                                                                                                                                                                                                                                           | Other                                   |
|                        | 16 | <a href="http://health.adelaide.edu.au/tracking-applications/">http://health.adelaide.edu.au/tracking-applications/</a>                                                                                                                                                                                                                 | Other                                   |
|                        | 17 | <a href="http://www.heart.org/HEARTORG/Conditions/More/ToolsForYourHeartHealth/Keep-Track-of-Your-Heart-Health_UCM_318041_Article.jsp">http://www.heart.org/HEARTORG/Conditions/More/ToolsForYourHeartHealth/Keep-Track-of-Your-Heart-Health_UCM_318041_Article.jsp</a>                                                                 | Government health information           |
|                        | 18 | <a href="http://www.pnewswire.com/news-releases/basis-health-tracker-and-web-service-reveals-new-way-to-make-lasting-improvements-to-fitness-and-sleep-181359501.html">http://www.pnewswire.com/news-releases/basis-health-tracker-and-web-service-reveals-new-way-to-make-lasting-improvements-to-fitness-and-sleep-181359501.html</a> | Media Article                           |
|                        | 19 | <a href="http://umbrella.com.au/prevention-launches-online-health-tracker-53633">http://umbrella.com.au/prevention-launches-online-health-tracker-53633</a>                                                                                                                                                                             | Links to Online Health Program          |
|                        | 20 | <a href="http://www.chartmyself.com/">http://www.chartmyself.com/</a>                                                                                                                                                                                                                                                                   | NGO health information                  |
|                        | 21 | <a href="https://www.heart360.org/">https://www.heart360.org/</a>                                                                                                                                                                                                                                                                       | Dead link                               |
|                        | 22 | <a href="http://www.forbes.com/forbes/2010/1206/investment-guide-medical-spending-health-care-tracking-vital-signs.html">http://www.forbes.com/forbes/2010/1206/investment-guide-medical-spending-health-care-tracking-vital-signs.html</a>                                                                                             | Other                                   |
|                        | 23 | <a href="http://tarasabo.blogspot.com/2012/01/tracking-your-health-and-fitness-online.html">http://tarasabo.blogspot.com/2012/01/tracking-your-health-and-fitness-online.html</a>                                                                                                                                                       | NGO health information                  |
|                        | 24 | <a href="http://www.shapeup.com/news/article/shapeup-enhances-online-health-tracking-with-bodymedia-fit-armband-system-l">http://www.shapeup.com/news/article/shapeup-enhances-online-health-tracking-with-bodymedia-fit-armband-system-l</a>                                                                                           | Links to Online Health Program          |

|  |    |                                                                                                                                                                                                       |                                |
|--|----|-------------------------------------------------------------------------------------------------------------------------------------------------------------------------------------------------------|--------------------------------|
|  | 25 | <a href="http://gigaom.com/2012/10/30/note-to-startups-dont-forget-the-skinny-jeans-health-trackers/">http://gigaom.com/2012/10/30/note-to-startups-dont-forget-the-skinny-jeans-health-trackers/</a> | NGO health information         |
|  | 26 | <a href="https://www.flshots.com/flshots/signin.csp">https://www.flshots.com/flshots/signin.csp</a>                                                                                                   | Other                          |
|  | 27 | <a href="http://www.cnn.com/2009/HEALTH/expert.q.a/04/24/diet.tracking.sites.jam.polis/index.html">http://www.cnn.com/2009/HEALTH/expert.q.a/04/24/diet.tracking.sites.jam.polis/index.html</a>       | Links to Online Health Program |
|  | 28 | <a href="https://healthmanager.mayoclinic.com/help.aspx">https://healthmanager.mayoclinic.com/help.aspx</a>                                                                                           | Other                          |
|  | 29 | <a href="http://www.hwia.com.au/pages/my-health-my-responsibility.php">http://www.hwia.com.au/pages/my-health-my-responsibility.php</a>                                                               | Other                          |
|  | 30 | <a href="http://www.kevinmd.com/blog/2012/04/gender-divide-health-tracking-online.html">http://www.kevinmd.com/blog/2012/04/gender-divide-health-tracking-online.html</a>                             | Other                          |

|                 |    |                                                                                                                                                                                                                                                             |                                         |
|-----------------|----|-------------------------------------------------------------------------------------------------------------------------------------------------------------------------------------------------------------------------------------------------------------|-----------------------------------------|
| Health Tracking | 1  | <a href="http://health.adelaide.edu.au/tracking/">http://health.adelaide.edu.au/tracking/</a>                                                                                                                                                               | NGO health information                  |
|                 | 2  | <a href="http://www.preventionhealthtracker.com.au/">http://www.preventionhealthtracker.com.au/</a>                                                                                                                                                         | Physical activity Online Health program |
|                 | 3  | <a href="http://www.healthtrack.com.au/">http://www.healthtrack.com.au/</a>                                                                                                                                                                                 | Other                                   |
|                 | 4  | <a href="http://www.bodyandsoul.com.au/health+healing/news+features/top+50+health+apps16209">http://www.bodyandsoul.com.au/health+healing/news+features/top+50+health+apps16209</a>                                                                         | NGO health information                  |
|                 | 5  | <a href="http://techland.time.com/2013/01/10/basis-health-tracking-watch-sports-serious-sensors-new-android-app/">http://techland.time.com/2013/01/10/basis-health-tracking-watch-sports-serious-sensors-new-android-app/</a>                               | Media Article                           |
|                 | 6  | <a href="http://www.chartmyself.com/">http://www.chartmyself.com/</a>                                                                                                                                                                                       | NGO health information                  |
|                 | 7  | <a href="http://fitbie.msn.com/fit-tracker">http://fitbie.msn.com/fit-tracker</a>                                                                                                                                                                           | Online Health program                   |
|                 | 8  | <a href="https://hrtapp.com/">https://hrtapp.com/</a>                                                                                                                                                                                                       | NGO health information                  |
|                 | 9  | <a href="http://www.mindmehealth.com/blog/tags/tag/health-tracking-software-1">http://www.mindmehealth.com/blog/tags/tag/health-tracking-software-1</a>                                                                                                     | Non PA Online Health Program            |
|                 | 10 | <a href="http://venturebeat.com/2012/11/29/basis-science-reveals-its-health-tracking-wristwatch-and-fitness-web-service/">http://venturebeat.com/2012/11/29/basis-science-reveals-its-health-tracking-wristwatch-and-fitness-web-service/</a>               | Links to Online Health Program          |
|                 | 11 | <a href="http://www.kff.org/kaiserpolls/trackingpoll.cfm">http://www.kff.org/kaiserpolls/trackingpoll.cfm</a>                                                                                                                                               | Other                                   |
|                 | 12 | <a href="http://www.icpsr.umich.edu/icpsrweb/HMCA/studies/34141">http://www.icpsr.umich.edu/icpsrweb/HMCA/studies/34141</a>                                                                                                                                 | Research article                        |
|                 | 13 | <a href="http://www.forbes.com/sites/davidmaris/2013/01/12/health-tracking-gizmos-for-the-new-year/">http://www.forbes.com/sites/davidmaris/2013/01/12/health-tracking-gizmos-for-the-new-year/</a>                                                         | Media Article                           |
|                 | 14 | <a href="https://myupmc.upmc.com/">https://myupmc.upmc.com/</a>                                                                                                                                                                                             | Other                                   |
|                 | 15 | <a href="http://healthmarketinnovations.org/program/community-health-information-tracking-system-chits">http://healthmarketinnovations.org/program/community-health-information-tracking-system-chits</a>                                                   | Profile page                            |
|                 | 16 | <a href="http://venturebeat.com/2013/01/06/bodymedia-launches-beefed-up-health-tracking-system-for-your-arm/">http://venturebeat.com/2013/01/06/bodymedia-launches-beefed-up-health-tracking-system-for-your-arm/</a>                                       | Media Article                           |
|                 | 17 | <a href="http://health.adelaide.edu.au/">http://health.adelaide.edu.au/</a>                                                                                                                                                                                 | Other                                   |
|                 | 18 | <a href="http://www.utshealth.com/">http://www.utshealth.com/</a>                                                                                                                                                                                           | Other                                   |
|                 | 19 | <a href="http://thecarrot.com/">http://thecarrot.com/</a>                                                                                                                                                                                                   | Physical activity Online Health program |
|                 | 20 | <a href="http://www.uq.edu.au/hishub/theme4">http://www.uq.edu.au/hishub/theme4</a>                                                                                                                                                                         | Other                                   |
|                 | 21 | <a href="http://techcrunch.com/2012/11/29/basis-takes-on-jawbone-nike-finally-launches-its-impressive-199-health-tracking-band/">http://techcrunch.com/2012/11/29/basis-takes-on-jawbone-nike-finally-launches-its-impressive-199-health-tracking-band/</a> | Media Article                           |
|                 | 22 | <a href="http://healthvermont.gov/tracking/">http://healthvermont.gov/tracking/</a>                                                                                                                                                                         | Government health information           |

|  |    |                                                                                                                                                                                                 |                        |
|--|----|-------------------------------------------------------------------------------------------------------------------------------------------------------------------------------------------------|------------------------|
|  | 23 | <a href="http://nwbc.com.au/resources/trackingforms.html">http://nwbc.com.au/resources/trackingforms.html</a>                                                                                   | NGO health information |
|  | 24 | <a href="http://www.ocreger.com/articles/health-367758-smarr-tracking.html">http://www.ocreger.com/articles/health-367758-smarr-tracking.html</a>                                               | Media Article          |
|  | 25 | <a href="http://www.boston.com/lifestyle/health/gallery/wearable_trackers/">http://www.boston.com/lifestyle/health/gallery/wearable_trackers/</a>                                               | Media Article          |
|  | 26 | <a href="http://www.cnn.com/2012/09/21/health/quantified-self-data/index.html">http://www.cnn.com/2012/09/21/health/quantified-self-data/index.html</a>                                         | Media Article          |
|  | 27 | <a href="http://msdn.microsoft.com/en-us/library/dd792678.aspx">http://msdn.microsoft.com/en-us/library/dd792678.aspx</a>                                                                       | Other                  |
|  | 28 | <a href="http://msdn.microsoft.com/en-us/library/ee267758(v=bts.10).aspx">http://msdn.microsoft.com/en-us/library/ee267758(v=bts.10).aspx</a>                                                   | Other                  |
|  | 29 | <a href="http://www.scientificamerican.com/citizen-science/project.cfm?id=health-tracking-network">http://www.scientificamerican.com/citizen-science/project.cfm?id=health-tracking-network</a> | Other                  |
|  | 30 | <a href="http://www.medstudentonline.com.au/f100/health-tracking-boh-24543/">http://www.medstudentonline.com.au/f100/health-tracking-boh-24543/</a>                                             | Other                  |

|                        |    |                                                                                                                                                                                                 |                                         |
|------------------------|----|-------------------------------------------------------------------------------------------------------------------------------------------------------------------------------------------------|-----------------------------------------|
| Free exercise websites | 1  | <a href="http://www.workoutz.com/">http://www.workoutz.com/</a>                                                                                                                                 | Physical activity Online Health program |
|                        | 2  | <a href="http://www.bodybuilding.com/exercises/">http://www.bodybuilding.com/exercises/</a>                                                                                                     | Physical activity Online Health program |
|                        | 3  | <a href="http://www.cairnsesplanade.com.au/Active%20Living%20-%20Fun%20Free%20Fitness">http://www.cairnsesplanade.com.au/Active%20Living%20-%20Fun%20Free%20Fitness</a>                         | Other                                   |
|                        | 4  | <a href="http://www.fitness.com/">http://www.fitness.com/</a>                                                                                                                                   | Physical activity Online Health program |
|                        | 5  | <a href="http://www.livestrong.com/article/80108-exercise-videos-online/">http://www.livestrong.com/article/80108-exercise-videos-online/</a>                                                   | Physical activity Online Health program |
|                        | 6  | <a href="http://fitness-websites.no1reviews.com/">http://fitness-websites.no1reviews.com/</a>                                                                                                   | Links to Online Health Program          |
|                        | 7  | <a href="http://www.fitday.com/">http://www.fitday.com/</a>                                                                                                                                     | Physical activity Online Health program |
|                        | 8  | <a href="http://www.freetrainers.com/">http://www.freetrainers.com/</a>                                                                                                                         | Physical activity Online Health program |
|                        | 9  | <a href="http://www.oobafit.com/">http://www.oobafit.com/</a>                                                                                                                                   | Physical activity Online Health program |
|                        | 10 | <a href="http://exercise.about.com/od/healthinjuries/a/internetinfo_2.htm">http://exercise.about.com/od/healthinjuries/a/internetinfo_2.htm</a>                                                 | Links to Online Health Program          |
|                        | 11 | <a href="http://www.fitsync.com/">http://www.fitsync.com/</a>                                                                                                                                   | Physical activity Online Health program |
|                        | 12 | <a href="http://www.myfitnesspal.com/topics/show/613477-free-online-exercise-websites">http://www.myfitnesspal.com/topics/show/613477-free-online-exercise-websites</a>                         | Physical activity Online Health program |
|                        | 13 | <a href="http://www.myfitnesspal.com/">http://www.myfitnesspal.com/</a>                                                                                                                         | Physical activity Online Health program |
|                        | 14 | <a href="http://www.exrx.net/">http://www.exrx.net/</a>                                                                                                                                         | Physical activity Online Health program |
|                        | 15 | <a href="http://www.exercise4weightloss.com/">http://www.exercise4weightloss.com/</a>                                                                                                           | Physical activity Online Health program |
|                        | 16 | <a href="http://www.makeoverfitness.com/">http://www.makeoverfitness.com/</a>                                                                                                                   | Physical activity Online Health program |
|                        | 17 | <a href="http://www.acefitness.org/exerciselibrary/">http://www.acefitness.org/exerciselibrary/</a>                                                                                             | Physical activity Online Health program |
|                        | 18 | <a href="http://www.darebin.vic.gov.au/Page/Page.aspx?Page_Id=9776">http://www.darebin.vic.gov.au/Page/Page.aspx?Page_Id=9776</a>                                                               | Other                                   |
|                        | 19 | <a href="http://www.nycgovparks.org/befitnyc">http://www.nycgovparks.org/befitnyc</a>                                                                                                           | Profile page                            |
|                        | 20 | <a href="http://www.nhs.uk/Livewell/fitness/Pages/Getfitwithoutgym.aspx">http://www.nhs.uk/Livewell/fitness/Pages/Getfitwithoutgym.aspx</a>                                                     | Government health information           |
|                        | 21 | <a href="http://www.ilovefreesoftware.com/21/webware/free-websites-to-make-exercise-schedule.html">http://www.ilovefreesoftware.com/21/webware/free-websites-to-make-exercise-schedule.html</a> | Links to Online Health Program          |
|                        | 22 | <a href="http://www.myfitnesspal.com/topics/show/315302-free-workout-sites">http://www.myfitnesspal.com/topics/show/315302-free-workout-sites</a>                                               | Physical activity Online Health program |
|                        | 23 | <a href="http://www.physicalfitnet.com/">http://www.physicalfitnet.com/</a>                                                                                                                     | Physical activity Online Health program |
|                        | 24 | <a href="http://www.bodyrock.tv/">http://www.bodyrock.tv/</a>                                                                                                                                   | Physical activity Online Health program |



|  |    |                                                                                                                                                                                                                                             |                                         |
|--|----|---------------------------------------------------------------------------------------------------------------------------------------------------------------------------------------------------------------------------------------------|-----------------------------------------|
|  | 25 | <a href="http://www.ibodyfit.com/">http://www.ibodyfit.com/</a>                                                                                                                                                                             | Dead Link                               |
|  | 26 | <a href="http://www.thesaladgirl.com/best-workout-videos-free-exercise-routines/">http://www.thesaladgirl.com/best-workout-videos-free-exercise-routines/</a>                                                                               | Links to Online Health Program          |
|  | 27 | <a href="http://www.youtube.com/playlist?list=PLE4C5C45435CD7C95">http://www.youtube.com/playlist?list=PLE4C5C45435CD7C95</a>                                                                                                               | Physical activity Online Health program |
|  | 28 | <a href="http://shape.workoutmusic.com/">http://shape.workoutmusic.com/</a>                                                                                                                                                                 | Other                                   |
|  | 29 | <a href="http://www.fitness-singles.com/">http://www.fitness-singles.com/</a>                                                                                                                                                               | Other                                   |
|  | 30 | <a href="http://www.parentsconnect.com/parents/your-life/exercise-for-parents/customized-workout-routines-websites.html">http://www.parentsconnect.com/parents/your-life/exercise-for-parents/customized-workout-routines-websites.html</a> | Links to Online Health Program          |

|                             |    |                                                                                                                                                                                                           |                                         |
|-----------------------------|----|-----------------------------------------------------------------------------------------------------------------------------------------------------------------------------------------------------------|-----------------------------------------|
| Physical activity recording | 1  | <a href="http://www.walkgeorgia.org/index.cfm?public=UsingOnlineTools">http://www.walkgeorgia.org/index.cfm?public=UsingOnlineTools</a>                                                                   | Physical activity Online Health program |
|                             | 2  | <a href="http://www.cdc.gov/physicalactivity/data/surveillance.html">http://www.cdc.gov/physicalactivity/data/surveillance.html</a>                                                                       | Government health information           |
|                             | 3  | <a href="http://www.healthykids.nsw.gov.au/teachers-childcare/physical-activity-primary-school.aspx">http://www.healthykids.nsw.gov.au/teachers-childcare/physical-activity-primary-school.aspx</a>       | Government health information           |
|                             | 4  | <a href="http://www.nature.com/ijo/journal/v29/n3/full/0802882a.html">http://www.nature.com/ijo/journal/v29/n3/full/0802882a.html</a>                                                                     | Research article                        |
|                             | 5  | <a href="http://www.ncbi.nlm.nih.gov/pubmed/15672111">http://www.ncbi.nlm.nih.gov/pubmed/15672111</a>                                                                                                     | Research article                        |
|                             | 6  | <a href="http://www.dhs.wisconsin.gov/health/physicalactivity/ToolCalcs.htm">http://www.dhs.wisconsin.gov/health/physicalactivity/ToolCalcs.htm</a>                                                       | Government health information           |
|                             | 7  | <a href="http://sydney.edu.au/medicine/public-health/cpah/pdfs/2007_pa_measurement_farrell.pdf">http://sydney.edu.au/medicine/public-health/cpah/pdfs/2007_pa_measurement_farrell.pdf</a>                 | Research article                        |
|                             | 8  | <a href="http://www.csa.com/factsheets/pei-set-c.php">http://www.csa.com/factsheets/pei-set-c.php</a>                                                                                                     | Other                                   |
|                             | 9  | <a href="http://cbrcc.curtin.edu.au/reports_journal_articles/ajpm%2041%2023-28.pdf">http://cbrcc.curtin.edu.au/reports_journal_articles/ajpm%2041%2023-28.pdf</a>                                         | Research article                        |
|                             | 10 | <a href="http://www.atrf11.unisa.edu.au/Assets/Papers/ATRF11_0164_final.pdf">http://www.atrf11.unisa.edu.au/Assets/Papers/ATRF11_0164_final.pdf</a>                                                       | Government health information           |
|                             | 11 | <a href="http://www.beactive.wa.gov.au/index.php?id=1395">http://www.beactive.wa.gov.au/index.php?id=1395</a>                                                                                             | Research article                        |
|                             | 12 | <a href="http://tde.sagepub.com/content/32/1/69.abstract">http://tde.sagepub.com/content/32/1/69.abstract</a>                                                                                             | Research article                        |
|                             | 13 | <a href="http://www.ucsdparc.org/index.php?option=com_content&amp;view=article&amp;id=94&amp;Itemid=82">http://www.ucsdparc.org/index.php?option=com_content&amp;view=article&amp;id=94&amp;Itemid=82</a> | Other                                   |
|                             | 14 | <a href="http://www.plosone.org/article/info%3Adoi%2F10.1371%2Fjournal.pone.0042202">http://www.plosone.org/article/info%3Adoi%2F10.1371%2Fjournal.pone.0042202</a>                                       | Research article                        |
|                             | 15 | <a href="http://www.healthpromotion.com.au/Documents/CIM/Workplace_Challenge.pdf">http://www.healthpromotion.com.au/Documents/CIM/Workplace_Challenge.pdf</a>                                             | Profile page                            |
|                             | 16 | <a href="http://www.scsepf.org/doc/210606/JESF0401-06.pdf">http://www.scsepf.org/doc/210606/JESF0401-06.pdf</a>                                                                                           | Research article                        |
|                             | 17 | <a href="http://www.ncbi.nlm.nih.gov/pubmed/19330930">http://www.ncbi.nlm.nih.gov/pubmed/19330930</a>                                                                                                     | Research article                        |
|                             | 18 | <a href="http://digitalcommons.library.umaine.edu/cgi/viewcontent.cgi?article=1095&amp;context=etd">http://digitalcommons.library.umaine.edu/cgi/viewcontent.cgi?article=1095&amp;context=etd</a>         | Research article                        |
|                             | 19 | <a href="http://www.10000steps.org.au/pdfs/conversion.pdf">http://www.10000steps.org.au/pdfs/conversion.pdf</a>                                                                                           | Physical activity Online Health program |
|                             | 20 | <a href="http://www.health.qld.gov.au/ph/documents/hpu/healthykidsqld2006d.pdf">http://www.health.qld.gov.au/ph/documents/hpu/healthykidsqld2006d.pdf</a>                                                 | Government health information           |
|                             | 21 | <a href="http://thepegeek.com/2010/03/31/the-physical-activity-log/">http://thepegeek.com/2010/03/31/the-physical-activity-log/</a>                                                                       | Physical activity Online Health program |
|                             | 22 | <a href="http://sma.org.au/2010/11/iphone-app-to-increase-physical-activity/">http://sma.org.au/2010/11/iphone-app-to-increase-physical-activity/</a>                                                     | NGO health information                  |
|                             | 23 | <a href="http://www.tandfonline.com/doi/abs/10.1080/00071668508416845">http://www.tandfonline.com/doi/abs/10.1080/00071668508416845</a>                                                                   | Other                                   |



|  |    |                                                                                                                                                                                                                                                                                                                                                                 |                               |
|--|----|-----------------------------------------------------------------------------------------------------------------------------------------------------------------------------------------------------------------------------------------------------------------------------------------------------------------------------------------------------------------|-------------------------------|
|  | 24 | <a href="http://www.health.gov.au/internet/main/publishing.nsf/content/66596E8FC68FD1A3CA2574D50027DB86/\$File/childrens-nut-phys-survey.pdf">http://www.health.gov.au/internet/main/publishing.nsf/content/66596E8FC68FD1A3CA2574D50027DB86/\$File/childrens-nut-phys-survey.pdf</a>                                                                           | Government health information |
|  | 25 | <a href="http://www.medicaljournals.se/jrm/content/download.php?doi=10.2340/16501977-0013">http://www.medicaljournals.se/jrm/content/download.php?doi=10.2340/16501977-0013</a>                                                                                                                                                                                 | Research article              |
|  | 26 | <a href="http://www.archbronconeumol.org/">http://www.archbronconeumol.org/</a>                                                                                                                                                                                                                                                                                 | Dead link                     |
|  | 27 | <a href="http://www.ncbi.nlm.nih.gov/pubmed/16898273">http://www.ncbi.nlm.nih.gov/pubmed/16898273</a>                                                                                                                                                                                                                                                           | Research article              |
|  | 28 | <a href="http://informahealthcare.com/doi/pdf/10.3109/15412555.2012.708066">http://informahealthcare.com/doi/pdf/10.3109/15412555.2012.708066</a>                                                                                                                                                                                                               | Dead link                     |
|  | 29 | <a href="http://productzone.thoracicsurgerynews.com/term/8894/software-physiologic-recording-physical-activity">http://productzone.thoracicsurgerynews.com/term/8894/software-physiologic-recording-physical-activity</a>                                                                                                                                       | Other                         |
|  | 30 | <a href="http://www.cqu.edu.au/research/research-organisations/institutes/health-and-social-sciences/centres2/centre-for-physical-activity-studies/research-outcomes/publications">http://www.cqu.edu.au/research/research-organisations/institutes/health-and-social-sciences/centres2/centre-for-physical-activity-studies/research-outcomes/publications</a> | Other                         |

|                    |    |                                                                                                                                                                                                                         |                                         |
|--------------------|----|-------------------------------------------------------------------------------------------------------------------------------------------------------------------------------------------------------------------------|-----------------------------------------|
| Exercise recording | 1  | <a href="http://www.shapefit.com/exercise-journals.html">http://www.shapefit.com/exercise-journals.html</a>                                                                                                             | Research article                        |
|                    | 2  | <a href="https://sites.google.com/a/worksmartlabs.com/help-center/cardiotrainer/recording-a-workout">https://sites.google.com/a/worksmartlabs.com/help-center/cardiotrainer/recording-a-workout</a>                     | Other                                   |
|                    | 3  | <a href="http://www.weightlossresources.co.uk/exercise.htm">http://www.weightlossresources.co.uk/exercise.htm</a>                                                                                                       | Physical activity Online Health program |
|                    | 4  | <a href="http://www.hws.edu/studentlife/counseling_relax.aspx">http://www.hws.edu/studentlife/counseling_relax.aspx</a>                                                                                                 | Other                                   |
|                    | 5  | <a href="http://www.myfitnesspal.com/topics/show/453031-recording-exercise">http://www.myfitnesspal.com/topics/show/453031-recording-exercise</a>                                                                       | Physical activity Online Health program |
|                    | 6  | <a href="http://www.fatsecret.com/Community.aspx?pa=fp&amp;t=49618">http://www.fatsecret.com/Community.aspx?pa=fp&amp;t=49618</a>                                                                                       | Physical activity Online Health program |
|                    | 7  | <a href="http://www.zachpoff.com/teaching/projects-in-sound-art/recording-101/">http://www.zachpoff.com/teaching/projects-in-sound-art/recording-101/</a>                                                               | Other                                   |
|                    | 8  | <a href="http://www.copilotmanual.com/index.php?option=com_content&amp;view=article&amp;id=137&amp;Itemid=270">http://www.copilotmanual.com/index.php?option=com_content&amp;view=article&amp;id=137&amp;Itemid=270</a> | Other                                   |
|                    | 9  | <a href="http://www.polar.fi/e_manuals/Move/Polar_Move_user_manual_English/ch02.html">http://www.polar.fi/e_manuals/Move/Polar_Move_user_manual_English/ch02.html</a>                                                   | Other                                   |
|                    | 10 | <a href="http://forums.watchuseek.com/f233/ambit-stopped-recording-74-minutes-mid-exercise-746966.html">http://forums.watchuseek.com/f233/ambit-stopped-recording-74-minutes-mid-exercise-746966.html</a>               | Other                                   |
|                    | 11 | <a href="http://www.androidtapp.com/jefit-workout-fitness-gymlog/jefit-exercise-recording/">http://www.androidtapp.com/jefit-workout-fitness-gymlog/jefit-exercise-recording/</a>                                       | Links to Online Health Program          |
|                    | 12 | <a href="http://www.ncbi.nlm.nih.gov/pmc/articles/PMC483966/">http://www.ncbi.nlm.nih.gov/pmc/articles/PMC483966/</a>                                                                                                   | Research article                        |
|                    | 13 | <a href="http://www.ncbi.nlm.nih.gov/pubmed/12964253">http://www.ncbi.nlm.nih.gov/pubmed/12964253</a>                                                                                                                   | Research article                        |
|                    | 14 | <a href="http://www.ncbi.nlm.nih.gov/pubmed/17281036">http://www.ncbi.nlm.nih.gov/pubmed/17281036</a>                                                                                                                   | Research article                        |
|                    | 15 | <a href="http://acronyms.thefreedictionary.com/Over-The-Horizon+Targeting+Exercise+Recording+Project">http://acronyms.thefreedictionary.com/Over-The-Horizon+Targeting+Exercise+Recording+Project</a>                   | Other                                   |
|                    | 16 | <a href="http://dombowerexercise.blogspot.com/2012/12/video-recording-your-workouts-benefits.html">http://dombowerexercise.blogspot.com/2012/12/video-recording-your-workouts-benefits.html</a>                         | Other                                   |
|                    | 17 | <a href="http://www.writeenough.org.uk/recording_skills.htm">http://www.writeenough.org.uk/recording_skills.htm</a>                                                                                                     | Other                                   |
|                    | 18 | <a href="http://tei.oucs.ox.ac.uk/Talks/2009-07-oxford/exercise-08-Names_People_and_Places.pdf">http://tei.oucs.ox.ac.uk/Talks/2009-07-oxford/exercise-08-Names_People_and_Places.pdf</a>                               | Other                                   |
|                    | 19 | <a href="http://www.weightware.com/exerciseeditor.htm">http://www.weightware.com/exerciseeditor.htm</a>                                                                                                                 | Physical activity Online Health program |

|    |                                                                                                                                                                                                   |                                                                                                                                                                                                                                                     |                                         |
|----|---------------------------------------------------------------------------------------------------------------------------------------------------------------------------------------------------|-----------------------------------------------------------------------------------------------------------------------------------------------------------------------------------------------------------------------------------------------------|-----------------------------------------|
|    | 20                                                                                                                                                                                                | <a href="http://community.learnandmaster.com/index.php?/topic/24316-4-note-solo-exercise/">http://community.learnandmaster.com/index.php?/topic/24316-4-note-solo-exercise/</a>                                                                     | Other                                   |
|    | 21                                                                                                                                                                                                | <a href="http://community.learnandmaster.com/index.php?/topic/20851-session-10-finger-style-beginner-exercise-recording/">http://community.learnandmaster.com/index.php?/topic/20851-session-10-finger-style-beginner-exercise-recording/</a>       | Other                                   |
|    | 22                                                                                                                                                                                                | <a href="http://iworkwell.ucol.ac.nz/">http://iworkwell.ucol.ac.nz/</a>                                                                                                                                                                             | Business level online health program    |
|    | 23                                                                                                                                                                                                | <a href="http://www.ncbi.nlm.nih.gov/pubmed/1006140">http://www.ncbi.nlm.nih.gov/pubmed/1006140</a>                                                                                                                                                 | Research article                        |
|    | 24                                                                                                                                                                                                | <a href="http://contextualpsychology.org/recording_of_mind_train_defusion_exercise">http://contextualpsychology.org/recording_of_mind_train_defusion_exercise</a>                                                                                   | Research article                        |
|    | 25                                                                                                                                                                                                | <a href="http://forum.bodybuilding.com/showthread.php?t=141753541&amp;page=1">http://forum.bodybuilding.com/showthread.php?t=141753541&amp;page=1</a>                                                                                               | Physical activity Online Health program |
|    | 26                                                                                                                                                                                                | <a href="http://www.physio-pedia.com/File:Strengthening_exercise_recording_sheet.pdf">http://www.physio-pedia.com/File:Strengthening_exercise_recording_sheet.pdf</a>                                                                               | Other                                   |
|    | 27                                                                                                                                                                                                | <a href="http://www.somaticmovementcenter.com/services/somaticexercises/">http://www.somaticmovementcenter.com/services/somaticexercises/</a>                                                                                                       | Other                                   |
|    | 28                                                                                                                                                                                                | <a href="http://acapella.harmony-central.com/showthread.php?2948438-Recording-guitar-for-use-in-a-random-exercise-generator">http://acapella.harmony-central.com/showthread.php?2948438-Recording-guitar-for-use-in-a-random-exercise-generator</a> | Dead link                               |
|    | 29                                                                                                                                                                                                | <a href="http://www.facebook.com/pages/Jogingphysical-exercise-recording-muzik/515349138482489">http://www.facebook.com/pages/Jogingphysical-exercise-recording-muzik/515349138482489</a>                                                           | Other                                   |
| 30 | <a href="http://www.comsys.rwth-aachen.de/teaching/ss-12/mit-lecture-and-exercise-video-recording/">http://www.comsys.rwth-aachen.de/teaching/ss-12/mit-lecture-and-exercise-video-recording/</a> | Other                                                                                                                                                                                                                                               |                                         |

|                 |    |                                                                                                                                                                                                                                                                           |                                         |
|-----------------|----|---------------------------------------------------------------------------------------------------------------------------------------------------------------------------------------------------------------------------------------------------------------------------|-----------------------------------------|
| Walking tracker | 1  | <a href="http://www.mapmywalk.com/">http://www.mapmywalk.com/</a>                                                                                                                                                                                                         | Physical activity Online Health program |
|                 | 2  | <a href="http://www.geodistance.com/">http://www.geodistance.com/</a>                                                                                                                                                                                                     | Other                                   |
|                 | 3  | <a href="http://walking.about.com/cs/measure/a/blhowtrack.htm">http://walking.about.com/cs/measure/a/blhowtrack.htm</a>                                                                                                                                                   | Links to Online Health Program          |
|                 | 4  | <a href="https://itunes.apple.com/au/app/mapmywalk-gps-walking/id307861492?mt=8">https://itunes.apple.com/au/app/mapmywalk-gps-walking/id307861492?mt=8</a>                                                                                                               | App                                     |
|                 | 5  | <a href="https://itunes.apple.com/us/app/walk-watch-gps-walking-computer/id384877736?mt=8">https://itunes.apple.com/us/app/walk-watch-gps-walking-computer/id384877736?mt=8</a>                                                                                           | App                                     |
|                 | 6  | <a href="http://www.justwalk.com/">http://www.justwalk.com/</a>                                                                                                                                                                                                           | Physical activity Online Health program |
|                 | 7  | <a href="http://startwalkingnow.org/mystart_tracker.jsp">http://startwalkingnow.org/mystart_tracker.jsp</a>                                                                                                                                                               | Government health information           |
|                 | 8  | <a href="http://walkertracker.com/">http://walkertracker.com/</a>                                                                                                                                                                                                         | Physical activity Online Health program |
|                 | 9  | <a href="http://www.manlyaustralia.com.au/information/what_to_do/walksViews.asp">http://www.manlyaustralia.com.au/information/what_to_do/walksViews.asp</a>                                                                                                               | Other                                   |
|                 | 10 | <a href="https://play.google.com/store/apps/details?id=com.mapmywalk.android2&amp;hl=en">https://play.google.com/store/apps/details?id=com.mapmywalk.android2&amp;hl=en</a>                                                                                               | App                                     |
|                 | 11 | <a href="http://www.androidcentral.com/google-slips-walking-and-cycling-tracking-card-google-now">http://www.androidcentral.com/google-slips-walking-and-cycling-tracking-card-google-now</a>                                                                             | Media Article                           |
|                 | 12 | <a href="http://www.sparkpeople.com/myspark/team_messageboard_thread.asp?board=19441x629x42879435">http://www.sparkpeople.com/myspark/team_messageboard_thread.asp?board=19441x629x42879435</a>                                                                           | Physical activity Online Health program |
|                 | 13 | <a href="http://www.nbcnews.com/technology/futureoftech/phone-tracking-tech-reward-walking-biking-120038">http://www.nbcnews.com/technology/futureoftech/phone-tracking-tech-reward-walking-biking-120038</a>                                                             | Media Article                           |
|                 | 14 | <a href="http://www.popsci.com/technology/article/2011-10/gps-enabled-walking-shoes-help-caregivers-track-alzheimer%E2%80%99s-patients">http://www.popsci.com/technology/article/2011-10/gps-enabled-walking-shoes-help-caregivers-track-alzheimer%E2%80%99s-patients</a> | Dead link                               |

|  |    |                                                                                                                                                                                                                                                                                                                         |                                         |
|--|----|-------------------------------------------------------------------------------------------------------------------------------------------------------------------------------------------------------------------------------------------------------------------------------------------------------------------------|-----------------------------------------|
|  | 15 | <a href="http://www.walkingwithattitude.com/">http://www.walkingwithattitude.com/</a>                                                                                                                                                                                                                                   | Physical activity Online Health program |
|  | 16 | <a href="http://www.mapmytracks.com/">http://www.mapmytracks.com/</a>                                                                                                                                                                                                                                                   | App                                     |
|  | 17 | <a href="https://itunes.apple.com/us/app/walk-tracker-gps-fitness-tracker/id453030204?mt=8">https://itunes.apple.com/us/app/walk-tracker-gps-fitness-tracker/id453030204?mt=8</a>                                                                                                                                       | App                                     |
|  | 18 | <a href="http://www.findanexpert.unimelb.edu.au/display/publication120801">http://www.findanexpert.unimelb.edu.au/display/publication120801</a>                                                                                                                                                                         | Profile page                            |
|  | 19 | <a href="http://www.petchecktechnology.com/">http://www.petchecktechnology.com/</a>                                                                                                                                                                                                                                     | Other                                   |
|  | 20 | <a href="http://stepsout.com/">http://stepsout.com/</a>                                                                                                                                                                                                                                                                 | Business level online health program    |
|  | 21 | <a href="http://www.newzealand.com/int/walking-and-hiking/">http://www.newzealand.com/int/walking-and-hiking/</a>                                                                                                                                                                                                       | Other                                   |
|  | 22 | <a href="http://www.ifp.illinois.edu/~hning2/papers/IVC04_ning%26tan.pdf">http://www.ifp.illinois.edu/~hning2/papers/IVC04_ning%26tan.pdf</a>                                                                                                                                                                           | Research article                        |
|  | 23 | <a href="http://short-walks.com.au/">http://short-walks.com.au/</a>                                                                                                                                                                                                                                                     | Other                                   |
|  | 24 | <a href="http://ieeexplore.ieee.org/xpl/articleDetails.jsp?reload=true&amp;arnumber=4938978">http://ieeexplore.ieee.org/xpl/articleDetails.jsp?reload=true&amp;arnumber=4938978</a>                                                                                                                                     | Research article                        |
|  | 25 | <a href="http://ieeexplore.ieee.org/xpl/articleDetails.jsp?reload=true&amp;arnumber=647403">http://ieeexplore.ieee.org/xpl/articleDetails.jsp?reload=true&amp;arnumber=647403</a>                                                                                                                                       | Research article                        |
|  | 26 | <a href="http://www.walkbiketoschool.org/keep-going/ongoing-activities/mileage-tracking">http://www.walkbiketoschool.org/keep-going/ongoing-activities/mileage-tracking</a>                                                                                                                                             | Physical activity Online Health program |
|  | 27 | <a href="http://www.tripadvisor.com.au/ShowUserReviews-g319722-d1067198-r35809607-Nkuringo_Gorilla_Camp-Bwindi_Impenetrable_National_Park_Western_Region.html">http://www.tripadvisor.com.au/ShowUserReviews-g319722-d1067198-r35809607-Nkuringo_Gorilla_Camp-Bwindi_Impenetrable_National_Park_Western_Region.html</a> | Other                                   |
|  | 28 | <a href="http://walking.about.com/od/pedometerprogram/Pedometer_Walking_and_Step_Tracker_Programs.htm">http://walking.about.com/od/pedometerprogram/Pedometer_Walking_and_Step_Tracker_Programs.htm</a>                                                                                                                 | Links to Online Health Program          |
|  | 29 | <a href="http://www.ywampublishing.com/p-258-tracking-your-walkbrthe-young-persons-prayer-diary.aspx">http://www.ywampublishing.com/p-258-tracking-your-walkbrthe-young-persons-prayer-diary.aspx</a>                                                                                                                   | Other                                   |
|  | 30 | <a href="http://www.apartmenttherapy.com/let-tech-help-you-with-dog-walking-173043">http://www.apartmenttherapy.com/let-tech-help-you-with-dog-walking-173043</a>                                                                                                                                                       | Other                                   |

|                  |    |                                                                                                                                                                                                                               |                                         |
|------------------|----|-------------------------------------------------------------------------------------------------------------------------------------------------------------------------------------------------------------------------------|-----------------------------------------|
| Fitness tracking | 1  | <a href="http://lifelhacker.com/5841439/five-best-fitness-tracking-web-sites-and-services">http://lifelhacker.com/5841439/five-best-fitness-tracking-web-sites-and-services</a>                                               | Links to Online Health Program          |
|                  | 2  | <a href="http://eftm.com.au/2013/01/ibitz-fitness-tracking-for-the-family-getting-the-kids-moving-9496">http://eftm.com.au/2013/01/ibitz-fitness-tracking-for-the-family-getting-the-kids-moving-9496</a>                     | Media Article                           |
|                  | 3  | <a href="http://www.gymtechnik.com/">http://www.gymtechnik.com/</a>                                                                                                                                                           | Physical activity Online Health program |
|                  | 4  | <a href="https://itunes.apple.com/au/app/jefit-workout-fitness-bodybuilding/id449810000?mt=8">https://itunes.apple.com/au/app/jefit-workout-fitness-bodybuilding/id449810000?mt=8</a>                                         | App                                     |
|                  | 5  | <a href="http://www.mapmyfitness.com/">http://www.mapmyfitness.com/</a>                                                                                                                                                       | Physical activity Online Health program |
|                  | 6  | <a href="http://dailyburn.com/">http://dailyburn.com/</a>                                                                                                                                                                     | Online Health program                   |
|                  | 7  | <a href="http://au.ibtimes.com/articles/215820/20110919/best-of-the-best-top-five-fitness-tracking-web-sites.htm">http://au.ibtimes.com/articles/215820/20110919/best-of-the-best-top-five-fitness-tracking-web-sites.htm</a> | Links to Online Health Program          |
|                  | 8  | <a href="http://www.onlinefitnesslog.com/">http://www.onlinefitnesslog.com/</a>                                                                                                                                               | Physical activity Online Health program |
|                  | 9  | <a href="http://www.lifelhacker.com.au/2011/09/five-best-fitness-tracking-web-sites-and-services/">http://www.lifelhacker.com.au/2011/09/five-best-fitness-tracking-web-sites-and-services/</a>                               | Links to Online Health Program          |
|                  | 10 | <a href="https://www.bicyclenetwork.com.au/forums/viewtopic.php?f=14&amp;t=21490">https://www.bicyclenetwork.com.au/forums/viewtopic.php?f=14&amp;t=21490</a>                                                                 | Other                                   |

|  |    |                                                                                                                                                                                                                                                                                             |                                         |
|--|----|---------------------------------------------------------------------------------------------------------------------------------------------------------------------------------------------------------------------------------------------------------------------------------------------|-----------------------------------------|
|  | 11 | <a href="http://www.dakotafit.com/">http://www.dakotafit.com/</a>                                                                                                                                                                                                                           | Physical activity Online Health program |
|  | 12 | <a href="http://www.myfitnesspal.com/">http://www.myfitnesspal.com/</a>                                                                                                                                                                                                                     | Physical activity Online Health program |
|  | 13 | <a href="http://www.skimble.com/">http://www.skimble.com/</a>                                                                                                                                                                                                                               | App                                     |
|  | 14 | <a href="http://www.gymheroapp.com/">http://www.gymheroapp.com/</a>                                                                                                                                                                                                                         | App                                     |
|  | 15 | <a href="http://support.xbox.com/games/dance-central/dance-central-3-fitness-tracking">http://support.xbox.com/games/dance-central/dance-central-3-fitness-tracking</a>                                                                                                                     | Other                                   |
|  | 16 | <a href="http://www.lifespanfitness.com/lifespanfitnessclub.html">http://www.lifespanfitness.com/lifespanfitnessclub.html</a>                                                                                                                                                               | Physical activity Online Health program |
|  | 17 | <a href="http://www.rubitrack.com/">http://www.rubitrack.com/</a>                                                                                                                                                                                                                           | App                                     |
|  | 18 | <a href="http://www.webmd.com/diet/food-fitness-planner/default.htm">http://www.webmd.com/diet/food-fitness-planner/default.htm</a>                                                                                                                                                         | Physical activity Online Health program |
|  | 19 | <a href="http://gizmodo.com/fitness-tracking/">http://gizmodo.com/fitness-tracking/</a>                                                                                                                                                                                                     | Media Article                           |
|  | 20 | <a href="http://www.macrumors.com/2013/01/07/ces-2013-wearable-health-and-fitness-tracker-roundup/">http://www.macrumors.com/2013/01/07/ces-2013-wearable-health-and-fitness-tracker-roundup/</a>                                                                                           | Links to Online Health Program          |
|  | 21 | <a href="http://www.electricfoxy.com/2013/01/a-new-fitness-tracking-device/">http://www.electricfoxy.com/2013/01/a-new-fitness-tracking-device/</a>                                                                                                                                         | Media Article                           |
|  | 22 | <a href="http://fittracker.shapefit.com/">http://fittracker.shapefit.com/</a>                                                                                                                                                                                                               | Physical activity Online Health program |
|  | 23 | <a href="http://www.gymtechnik.com/blackberry/">http://www.gymtechnik.com/blackberry/</a>                                                                                                                                                                                                   | App                                     |
|  | 24 | <a href="http://www.bodyplan.com/">http://www.bodyplan.com/</a>                                                                                                                                                                                                                             | Physical activity Online Health program |
|  | 25 | <a href="http://now.msn.com/fitness-tracking-apps-raise-privacy-concerns">http://now.msn.com/fitness-tracking-apps-raise-privacy-concerns</a>                                                                                                                                               | Media Article                           |
|  | 26 | <a href="http://discussion.evernote.com/topic/28720-an-app-for-fitness-tracking-with-evernote/">http://discussion.evernote.com/topic/28720-an-app-for-fitness-tracking-with-evernote/</a>                                                                                                   | App                                     |
|  | 27 | <a href="http://blog.visual.ly/visualizing-fitness-data/">http://blog.visual.ly/visualizing-fitness-data/</a>                                                                                                                                                                               | Links to Online Health Program          |
|  | 28 | <a href="http://sites.google.com/site/healthnewsresources/quizzes-calculators-self-assessments-decision-guides/health-and-fitness-tracking-apps">http://sites.google.com/site/healthnewsresources/quizzes-calculators-self-assessments-decision-guides/health-and-fitness-tracking-apps</a> | Links to Online Health Program          |
|  | 29 | <a href="http://www.mensfitness.com/training/best-fitness-and-nutrition-apps-for-iphone">http://www.mensfitness.com/training/best-fitness-and-nutrition-apps-for-iphone</a>                                                                                                                 | Media Article                           |
|  | 30 | <a href="http://dailytekk.com/2012/06/11/fitness-tracking-devices/">http://dailytekk.com/2012/06/11/fitness-tracking-devices/</a>                                                                                                                                                           | Links to Online Health Program          |

|                        |    |                                                                                                                                                                           |                                         |
|------------------------|----|---------------------------------------------------------------------------------------------------------------------------------------------------------------------------|-----------------------------------------|
| Free exercise tracking | 1  | <a href="http://www.fitday.com/">http://www.fitday.com/</a>                                                                                                               | Physical activity Online Health program |
|                        | 2  | <a href="http://www.onlinefitnesslog.com/">http://www.onlinefitnesslog.com/</a>                                                                                           | Physical activity Online Health program |
|                        | 3  | <a href="http://www.myfitnesspal.com/">http://www.myfitnesspal.com/</a>                                                                                                   | Physical activity Online Health program |
|                        | 4  | <a href="https://itunes.apple.com/us/app/dailyburn-tracker/id378928008?mt=8">https://itunes.apple.com/us/app/dailyburn-tracker/id378928008?mt=8</a>                       | Links to Online Health Program          |
|                        | 5  | <a href="http://www.livestrong.com/article/25929-workout-plan-creators/">http://www.livestrong.com/article/25929-workout-plan-creators/</a>                               | Links to Online Health Program          |
|                        | 6  | <a href="http://download.cnet.com/MedHelp-s-Exercise-Tracker/3000-2056_4-10909577.htm">http://download.cnet.com/MedHelp-s-Exercise-Tracker/3000-2056_4-10909577.htm</a>   | Links to Online Health Program          |
|                        | 7  | <a href="http://www.builtlean.com/2012/01/27/workout-log-template/">http://www.builtlean.com/2012/01/27/workout-log-template/</a>                                         | Physical activity Online Health program |
|                        | 8  | <a href="http://lifel hacker.com/5257812/six-best-exercise-planning-and-tracking-tools">http://lifel hacker.com/5257812/six-best-exercise-planning-and-tracking-tools</a> | Links to Online Health Program          |
|                        | 9  | <a href="http://dailyburn.com/">http://dailyburn.com/</a>                                                                                                                 | Physical activity Online Health program |
|                        | 10 | <a href="http://www.fitsync.com/">http://www.fitsync.com/</a>                                                                                                             | Physical activity Online Health program |

|  |    |                                                                                                                                                                                                                         |                                         |
|--|----|-------------------------------------------------------------------------------------------------------------------------------------------------------------------------------------------------------------------------|-----------------------------------------|
|  | 11 | <a href="http://bodyspace.bodybuilding.com/workouts/">http://bodyspace.bodybuilding.com/workouts/</a>                                                                                                                   | Physical activity Online Health program |
|  | 12 | <a href="http://www.bodybuilding.com/fun/printworklog.htm">http://www.bodybuilding.com/fun/printworklog.htm</a>                                                                                                         | Physical activity Online Health program |
|  | 13 | <a href="http://www.fasttracktofatloss.com/">http://www.fasttracktofatloss.com/</a>                                                                                                                                     | Links to Online Health Program          |
|  | 14 | <a href="http://www.examiner.com/article/usda-free-diet-and-exercise-tracking-tool-hits-one-million-user-mark">http://www.examiner.com/article/usda-free-diet-and-exercise-tracking-tool-hits-one-million-user-mark</a> | Links to Online Health Program          |
|  | 15 | <a href="http://www.freefitnesstracker.com/">http://www.freefitnesstracker.com/</a>                                                                                                                                     | Physical activity Online Health program |
|  | 16 | <a href="http://greatist.com/health/best-health-and-fitness-apps/">http://greatist.com/health/best-health-and-fitness-apps/</a>                                                                                         | Links to Online Health Program          |
|  | 17 | <a href="https://itunes.apple.com/us/app/exercise-tracker/id293603711?mt=8">https://itunes.apple.com/us/app/exercise-tracker/id293603711?mt=8</a>                                                                       | App                                     |
|  | 18 | <a href="http://www.berryreview.com/2008/08/12/gym-technik-free-workout-tracking-on-your-blackberry/">http://www.berryreview.com/2008/08/12/gym-technik-free-workout-tracking-on-your-blackberry/</a>                   | Links to Online Health Program          |
|  | 19 | <a href="http://citeseerx.ist.psu.edu/viewdoc/download?doi=10.1.1.87.6500&amp;rep=rep1&amp;type=pdf">http://citeseerx.ist.psu.edu/viewdoc/download?doi=10.1.1.87.6500&amp;rep=rep1&amp;type=pdf</a>                     | Research article                        |
|  | 20 | <a href="https://play.google.com/store/apps/details?id=je.fit&amp;hl=en">https://play.google.com/store/apps/details?id=je.fit&amp;hl=en</a>                                                                             | App                                     |
|  | 21 | <a href="http://voices.yahoo.com/top-5-free-iphone-diet-exercise-apps-6392942.html">http://voices.yahoo.com/top-5-free-iphone-diet-exercise-apps-6392942.html</a>                                                       | Links to Online Health Program          |
|  | 22 | <a href="http://www.healthehuman.com/features/exercise-workout-tracker">http://www.healthehuman.com/features/exercise-workout-tracker</a>                                                                               | Physical activity Online Health program |
|  | 23 | <a href="http://fittracker.shapefit.com/">http://fittracker.shapefit.com/</a>                                                                                                                                           | Online Health program                   |
|  | 24 | <a href="http://www.phonicslessons.co.uk/trackingactivities.html">http://www.phonicslessons.co.uk/trackingactivities.html</a>                                                                                           | Other                                   |
|  | 25 | <a href="http://www.fitclick.com/">http://www.fitclick.com/</a>                                                                                                                                                         | Physical activity Online Health program |
|  | 26 | <a href="http://mashable.com/2009/01/03/free-iphone-apps-to-lose-weight/">http://mashable.com/2009/01/03/free-iphone-apps-to-lose-weight/</a>                                                                           | Links to Online Health Program          |
|  | 27 | <a href="https://itunes.apple.com/en/app/body-fitness-free-ultimate/id343227312?mt=8">https://itunes.apple.com/en/app/body-fitness-free-ultimate/id343227312?mt=8</a>                                                   | App                                     |
|  | 28 | <a href="http://www.lifehacker.com.au/2009/05/five-best-exercise-planning-and-tracking-tools/">http://www.lifehacker.com.au/2009/05/five-best-exercise-planning-and-tracking-tools/</a>                                 | Links to Online Health Program          |
|  | 29 | <a href="http://www.gymheroapp.com/">http://www.gymheroapp.com/</a>                                                                                                                                                     | App                                     |
|  | 30 | <a href="http://www.warriorxfit.com/">http://www.warriorxfit.com/</a>                                                                                                                                                   | Physical activity Online Health program |

|                   |    |                                                                                                                                               |                                |
|-------------------|----|-----------------------------------------------------------------------------------------------------------------------------------------------|--------------------------------|
| Exercise software | 1  | <a href="http://www.exercisesoftware.com/">http://www.exercisesoftware.com/</a>                                                               | Online Health program          |
|                   | 2  | <a href="http://fitness-software-review.toptenreviews.com/">http://fitness-software-review.toptenreviews.com/</a>                             | Links to Online Health Program |
|                   | 3  | <a href="http://www.proconditioning.com.au/">http://www.proconditioning.com.au/</a>                                                           | Commercial software            |
|                   | 4  | <a href="http://www.physiotools.com/">http://www.physiotools.com/</a>                                                                         | Commercial software            |
|                   | 5  | <a href="http://www.visualcoaching.com/">http://www.visualcoaching.com/</a>                                                                   | Profile page                   |
|                   | 6  | <a href="http://www.mavenlive.com/">http://www.mavenlive.com/</a>                                                                             | Profile page                   |
|                   | 7  | <a href="http://www.physiotec.net.au/">http://www.physiotec.net.au/</a>                                                                       | Commercial software            |
|                   | 8  | <a href="http://www.exrx.net/Store/Lists/Software.html">http://www.exrx.net/Store/Lists/Software.html</a>                                     | Profile page                   |
|                   | 9  | <a href="http://www.bioexsystems.com/product-line-exercise-software.aspx">http://www.bioexsystems.com/product-line-exercise-software.aspx</a> | Commercial software            |
|                   | 10 | <a href="http://www.vhikits.com/">http://www.vhikits.com/</a>                                                                                 | Profile page                   |
|                   | 11 | <a href="http://www.bioexsystems.com/">http://www.bioexsystems.com/</a>                                                                       | Commercial software            |

|  |    |                                                                                                                                                                                                                               |                                         |
|--|----|-------------------------------------------------------------------------------------------------------------------------------------------------------------------------------------------------------------------------------|-----------------------------------------|
|  | 12 | <a href="http://www.bioexsystems.com/exercise-pro.aspx">http://www.bioexsystems.com/exercise-pro.aspx</a>                                                                                                                     | Commercial software                     |
|  | 13 | <a href="http://physicaltherapyweb.com/exercise_prescription_software.php">http://physicaltherapyweb.com/exercise_prescription_software.php</a>                                                                               | Commercial software                     |
|  | 14 | <a href="http://www.fitnessbliss.com/">http://www.fitnessbliss.com/</a>                                                                                                                                                       | App                                     |
|  | 15 | <a href="http://en.wikipedia.org/wiki/List_of_exercise_prescription_software">http://en.wikipedia.org/wiki/List_of_exercise_prescription_software</a>                                                                         | Other                                   |
|  | 16 | <a href="http://www.edu-technology.com/exercisepro.html">http://www.edu-technology.com/exercisepro.html</a>                                                                                                                   | Profile page                            |
|  | 17 | <a href="http://www.simpleset.net/">http://www.simpleset.net/</a>                                                                                                                                                             | Commercial software                     |
|  | 18 | <a href="http://www.therehablab.com/">http://www.therehablab.com/</a>                                                                                                                                                         | Commercial software                     |
|  | 19 | <a href="http://www.proconditioning.com.au/index.php?option=com_content&amp;view=article&amp;id=76&amp;Itemid=79">http://www.proconditioning.com.au/index.php?option=com_content&amp;view=article&amp;id=76&amp;Itemid=79</a> | Commercial software                     |
|  | 20 | <a href="http://www.accesshealth.com.au/exercise-products/exercise-software-programs/">http://www.accesshealth.com.au/exercise-products/exercise-software-programs/</a>                                                       | Other                                   |
|  | 21 | <a href="http://www.capterra.com/physical-therapy-software">http://www.capterra.com/physical-therapy-software</a>                                                                                                             | Links to Online Health Program          |
|  | 22 | <a href="http://guitar-and-bass-software.com/eng/exercise-list.html">http://guitar-and-bass-software.com/eng/exercise-list.html</a>                                                                                           | Profile page                            |
|  | 23 | <a href="http://training.strengthengine.com/">http://training.strengthengine.com/</a>                                                                                                                                         | Commercial software                     |
|  | 24 | <a href="http://www.biggly.com/">http://www.biggly.com/</a>                                                                                                                                                                   | Commercial software                     |
|  | 25 | <a href="http://www.dailyfitnesscenter.com/">http://www.dailyfitnesscenter.com/</a>                                                                                                                                           | Physical activity Online Health program |
|  | 26 | <a href="http://www.dakotafit.com/">http://www.dakotafit.com/</a>                                                                                                                                                             | Physical activity Online Health program |
|  | 27 | <a href="http://www.exercise-explorer.com/">http://www.exercise-explorer.com/</a>                                                                                                                                             | Profile page                            |
|  | 28 | <a href="http://www.us-cert.gov/reading_room/infosheet_Cyber%20Exercises.pdf">http://www.us-cert.gov/reading_room/infosheet_Cyber%20Exercises.pdf</a>                                                                         | Government health information           |
|  | 29 | <a href="http://www.mavenlive.com/features">http://www.mavenlive.com/features</a>                                                                                                                                             | Profile page                            |
|  | 30 | <a href="http://www.physx.com/">http://www.physx.com/</a>                                                                                                                                                                     | Profile page                            |

|                |    |                                                                                                                                                                                                                   |                                         |
|----------------|----|-------------------------------------------------------------------------------------------------------------------------------------------------------------------------------------------------------------------|-----------------------------------------|
| Weight tracker | 1  | <a href="https://itunes.apple.com/au/app/weight-tracker/id284756469?mt=8">https://itunes.apple.com/au/app/weight-tracker/id284756469?mt=8</a>                                                                     | App                                     |
|                | 2  | <a href="http://www.3fatchicks.com/diet/weight-tracker/">http://www.3fatchicks.com/diet/weight-tracker/</a>                                                                                                       | Links to Online Health Program          |
|                | 3  | <a href="http://www.weighttracker.info/">http://www.weighttracker.info/</a>                                                                                                                                       | Non PA Online Health Program            |
|                | 4  | <a href="http://www.fitwatch.com/fatpounders/">http://www.fitwatch.com/fatpounders/</a>                                                                                                                           | Physical activity Online Health program |
|                | 5  | <a href="http://www.healthyweightforum.org/eng/weight/">http://www.healthyweightforum.org/eng/weight/</a>                                                                                                         | Non PA Online Health Program            |
|                | 6  | <a href="http://www.tickerfactory.com/">http://www.tickerfactory.com/</a>                                                                                                                                         | App                                     |
|                | 7  | <a href="http://www.skinnyr.com/">http://www.skinnyr.com/</a>                                                                                                                                                     | Non PA Online Health Program            |
|                | 8  | <a href="http://download.cnet.com/My-Weight-Tracker/3000-2056_4-10909584.html">http://download.cnet.com/My-Weight-Tracker/3000-2056_4-10909584.html</a>                                                           | Links to Online Health Program          |
|                | 9  | <a href="https://play.google.com/store/apps/details?id=com.michaelfester.weighty&amp;hl=en">https://play.google.com/store/apps/details?id=com.michaelfester.weighty&amp;hl=en</a>                                 | App                                     |
|                | 10 | <a href="http://www.weight-tracker.buddyslim.com/">http://www.weight-tracker.buddyslim.com/</a>                                                                                                                   | Non PA Online Health Program            |
|                | 11 | <a href="http://www.google.com.au/ig/directory?type=gadgets&amp;url=www.google.com/ig/modules/google15.xml">http://www.google.com.au/ig/directory?type=gadgets&amp;url=www.google.com/ig/modules/google15.xml</a> | Other                                   |
|                | 12 | <a href="http://www.tactiosoft.com/en/products/targetweight">http://www.tactiosoft.com/en/products/targetweight</a>                                                                                               | App                                     |

|    |                                                                                   |                                                                                                                                                                                                               |                                         |
|----|-----------------------------------------------------------------------------------|---------------------------------------------------------------------------------------------------------------------------------------------------------------------------------------------------------------|-----------------------------------------|
|    | 13                                                                                | <a href="http://www.fitday.com/">http://www.fitday.com/</a>                                                                                                                                                   | Physical activity Online Health program |
|    | 14                                                                                | <a href="https://play.google.com/store/apps/details?id=com.Weight_Tracker&amp;hl=en">https://play.google.com/store/apps/details?id=com.Weight_Tracker&amp;hl=en</a>                                           | App                                     |
|    | 15                                                                                | <a href="http://www.mindmehealth.com/features/weight-tracker">http://www.mindmehealth.com/features/weight-tracker</a>                                                                                         | Non PA Online Health Program            |
|    | 16                                                                                | <a href="http://www.windowsphone.com/en-us/store/app/weight-tracker/e6b400bf-911c-e011-9264-00237de2db9e">http://www.windowsphone.com/en-us/store/app/weight-tracker/e6b400bf-911c-e011-9264-00237de2db9e</a> | App                                     |
|    | 17                                                                                | <a href="https://itunes.apple.com/au/app/target-weight-for-adults-personal/id338889966?mt=8">https://itunes.apple.com/au/app/target-weight-for-adults-personal/id338889966?mt=8</a>                           | App                                     |
|    | 18                                                                                | <a href="http://googlemodules.com/module/616/">http://googlemodules.com/module/616/</a>                                                                                                                       | Non PA Online Health Program            |
|    | 19                                                                                | <a href="http://appworld.blackberry.com/webstore/content/5780/">http://appworld.blackberry.com/webstore/content/5780/</a>                                                                                     | App                                     |
|    | 20                                                                                | <a href="http://www.babycenter.com/pregnancy-weight-gain-estimator">http://www.babycenter.com/pregnancy-weight-gain-estimator</a>                                                                             | Other                                   |
|    | 21                                                                                | <a href="https://launchpad.net/wtods">https://launchpad.net/wtods</a>                                                                                                                                         | Other                                   |
|    | 22                                                                                | <a href="http://www.hillspet.co.uk/en-gb/weight-management/weight-tracker-dog.html">http://www.hillspet.co.uk/en-gb/weight-management/weight-tracker-dog.html</a>                                             | Other                                   |
|    | 23                                                                                | <a href="http://appshopper.com/healthcare-fitness/pregnancy-weight-tracker">http://appshopper.com/healthcare-fitness/pregnancy-weight-tracker</a>                                                             | App                                     |
|    | 24                                                                                | <a href="http://www.doctoroz.com/videos/green-coffee-weight-tracker">http://www.doctoroz.com/videos/green-coffee-weight-tracker</a>                                                                           | Media Article                           |
|    | 25                                                                                | <a href="http://blackberry-applications.toptenreviews.com/health-and-fitness/weight-tracker-review.html">http://blackberry-applications.toptenreviews.com/health-and-fitness/weight-tracker-review.html</a>   | Links to Online Health Program          |
|    | 26                                                                                | <a href="http://office.microsoft.com/en-us/templates/measurements-weight-tracker-TC001168403.aspx">http://office.microsoft.com/en-us/templates/measurements-weight-tracker-TC001168403.aspx</a>               | Physical activity Online Health program |
|    | 27                                                                                | <a href="http://itunes.apple.com/au/app/weight-tracker/id536045029?mt=8">http://itunes.apple.com/au/app/weight-tracker/id536045029?mt=8</a>                                                                   | App                                     |
|    | 28                                                                                | <a href="http://www.gerber.com/AllStages/growth_and_development/pregnancy_weight_chart.aspx">http://www.gerber.com/AllStages/growth_and_development/pregnancy_weight_chart.aspx</a>                           | Non PA Online Health Program            |
|    | 29                                                                                | <a href="http://www.alfitness.com.au/">http://www.alfitness.com.au/</a>                                                                                                                                       | Physical activity Online Health program |
| 30 | <a href="http://fitbie.msn.com/fit-tracker">http://fitbie.msn.com/fit-tracker</a> | Physical activity Online Health program                                                                                                                                                                       |                                         |

|                          |    |                                                                                                                                                                                                                                                                             |                                         |
|--------------------------|----|-----------------------------------------------------------------------------------------------------------------------------------------------------------------------------------------------------------------------------------------------------------------------------|-----------------------------------------|
| Calorie exercise tracker | 1  | <a href="http://www.myfitnesspal.com/">http://www.myfitnesspal.com/</a>                                                                                                                                                                                                     | Physical activity Online Health program |
|                          | 2  | <a href="http://www.wired.com/playbook/2012/08/fitness-trackers/">http://www.wired.com/playbook/2012/08/fitness-trackers/</a>                                                                                                                                               | Links to Online Health Program          |
|                          | 3  | <a href="http://www.webmd.com/diet/food-fitness-planner/default.htm">http://www.webmd.com/diet/food-fitness-planner/default.htm</a>                                                                                                                                         | Physical activity Online Health program |
|                          | 4  | <a href="http://www.webmd.com/diet/healthtool-fitness-calorie-counter">http://www.webmd.com/diet/healthtool-fitness-calorie-counter</a>                                                                                                                                     | Physical activity Online Health program |
|                          | 5  | <a href="http://www.livestrong.com/thedailyplate/">http://www.livestrong.com/thedailyplate/</a>                                                                                                                                                                             | Physical activity Online Health program |
|                          | 6  | <a href="http://www.my-calorie-counter.com/">http://www.my-calorie-counter.com/</a>                                                                                                                                                                                         | Non PA Online Health Program            |
|                          | 7  | <a href="http://www.fitday.com/">http://www.fitday.com/</a>                                                                                                                                                                                                                 | Physical activity Online Health program |
|                          | 8  | <a href="https://itunes.apple.com/us/app/tap-track-calorie-counter/id307749752?mt=8">https://itunes.apple.com/us/app/tap-track-calorie-counter/id307749752?mt=8</a>                                                                                                         | App                                     |
|                          | 9  | <a href="http://www.nytimes.com/2012/01/05/technology/personaltech/devices-to-keep-track-of-calories-lost-or-gained.html?pagewanted=all">http://www.nytimes.com/2012/01/05/technology/personaltech/devices-to-keep-track-of-calories-lost-or-gained.html?pagewanted=all</a> | Media Article                           |
|                          | 10 | <a href="http://www.fitwatch.com/diary/activitydiary.html">http://www.fitwatch.com/diary/activitydiary.html</a>                                                                                                                                                             | Physical activity Online Health program |
|                          | 11 | <a href="http://www.mynetdiary.com/">http://www.mynetdiary.com/</a>                                                                                                                                                                                                         | Physical activity Online Health program |



|  |    |                                                                                                                                                                                                                 |                                         |
|--|----|-----------------------------------------------------------------------------------------------------------------------------------------------------------------------------------------------------------------|-----------------------------------------|
|  | 12 | <a href="http://www.healthstatus.com/calculate/cbc">http://www.healthstatus.com/calculate/cbc</a>                                                                                                               | Other                                   |
|  | 13 | <a href="http://caloriecount.about.com/">http://caloriecount.about.com/</a>                                                                                                                                     | Non PA Online Health Program            |
|  | 14 | <a href="http://www.myfooddiary.com/">http://www.myfooddiary.com/</a>                                                                                                                                           | Physical activity Online Health program |
|  | 15 | <a href="http://www.148apps.com/reviews/tap-track-calorie-weight-exercise-tracker/">http://www.148apps.com/reviews/tap-track-calorie-weight-exercise-tracker/</a>                                               | App                                     |
|  | 16 | <a href="http://www.windowsphone.com/en-au/store/app/calorie-tracker/1229f984-2e99-e011-986b-78e7d1fa76f8">http://www.windowsphone.com/en-au/store/app/calorie-tracker/1229f984-2e99-e011-986b-78e7d1fa76f8</a> | App                                     |
|  | 17 | <a href="https://itunes.apple.com/us/app/dailyburn-tracker/id378928008?mt=8">https://itunes.apple.com/us/app/dailyburn-tracker/id378928008?mt=8</a>                                                             | App                                     |
|  | 18 | <a href="http://mashable.com/2009/01/03/free-iphone-apps-to-lose-weight/">http://mashable.com/2009/01/03/free-iphone-apps-to-lose-weight/</a>                                                                   | Links to Online Health Program          |
|  | 19 | <a href="http://www.macworld.com/product/79923/tap-track-calorie-tracker.html">http://www.macworld.com/product/79923/tap-track-calorie-tracker.html</a>                                                         | App                                     |
|  | 20 | <a href="http://www.exercise4weightloss.com/calorie-intake-chart.html">http://www.exercise4weightloss.com/calorie-intake-chart.html</a>                                                                         | Physical activity Online Health program |
|  | 21 | <a href="http://iphone.appstorm.net/roundups/lifestyle-roundups/10-iphone-apps-for-counting-calories/">http://iphone.appstorm.net/roundups/lifestyle-roundups/10-iphone-apps-for-counting-calories/</a>         | Media Article                           |
|  | 22 | <a href="http://www.caloriesperhour.com/">http://www.caloriesperhour.com/</a>                                                                                                                                   | Non PA Online Health Program            |
|  | 23 | <a href="http://calorie-tracker.thelongmores.me.uk/">http://calorie-tracker.thelongmores.me.uk/</a>                                                                                                             | Non PA Online Health Program            |
|  | 24 | <a href="https://chrome.google.com/webstore/detail/diet-diary/neckuibmjhibmgoigmffjlihekefmfd">https://chrome.google.com/webstore/detail/diet-diary/neckuibmjhibmgoigmffjlihekefmfd</a>                         | App                                     |
|  | 25 | <a href="http://www.fitclick.com/calories_burned">http://www.fitclick.com/calories_burned</a>                                                                                                                   | Physical activity Online Health program |

|                 |    |                                                                                                                                                                                             |                                         |
|-----------------|----|---------------------------------------------------------------------------------------------------------------------------------------------------------------------------------------------|-----------------------------------------|
| Calorie tracker | 1  | <a href="http://www.myfitnesspal.com/">http://www.myfitnesspal.com/</a>                                                                                                                     | Physical activity Online Health program |
|                 | 2  | <a href="http://www.my-calorie-counter.com/">http://www.my-calorie-counter.com/</a>                                                                                                         | Non PA Online Health Program            |
|                 | 3  | <a href="https://itunes.apple.com/au/app/livestrong.com-calorie-tracker/id295305241?mt=8">https://itunes.apple.com/au/app/livestrong.com-calorie-tracker/id295305241?mt=8</a>               | App                                     |
|                 | 4  | <a href="http://www.fitday.com/about">http://www.fitday.com/about</a>                                                                                                                       | Physical activity Online Health program |
|                 | 5  | <a href="http://www.livestrong.com/thedailyplate/">http://www.livestrong.com/thedailyplate/</a>                                                                                             | NGO health information                  |
|                 | 6  | <a href="http://www.webmd.com/diet/food-fitness-planner/default.htm">http://www.webmd.com/diet/food-fitness-planner/default.htm</a>                                                         | Physical activity Online Health program |
|                 | 7  | <a href="http://www.preventionhealthtracker.com.au/">http://www.preventionhealthtracker.com.au/</a>                                                                                         | Physical activity Online Health program |
|                 | 8  | <a href="http://www.wired.com/playbook/2012/08/fitness-trackers/">http://www.wired.com/playbook/2012/08/fitness-trackers/</a>                                                               | Links to Online Health Program          |
|                 | 9  | <a href="https://appworld.blackberry.com/webstore/content/7152/">https://appworld.blackberry.com/webstore/content/7152/</a>                                                                 | App                                     |
|                 | 10 | <a href="http://ask.metafilter.com/177457/Whats-the-current-bestinclass-calorietracking-website">http://ask.metafilter.com/177457/Whats-the-current-bestinclass-calorietracking-website</a> | Links to Online Health Program          |

|  |    |                                                                                                                                                                                                                                                                             |                                         |
|--|----|-----------------------------------------------------------------------------------------------------------------------------------------------------------------------------------------------------------------------------------------------------------------------------|-----------------------------------------|
|  | 11 | <a href="http://www.perfect-diet-tracker.com/">http://www.perfect-diet-tracker.com/</a>                                                                                                                                                                                     | Non PA Online Health Program            |
|  | 12 | <a href="http://9gag.com/gag/4951128">http://9gag.com/gag/4951128</a>                                                                                                                                                                                                       | Other                                   |
|  | 13 | <a href="http://www.calorieking.com.au/">http://www.calorieking.com.au/</a>                                                                                                                                                                                                 | Physical activity Online Health program |
|  | 14 | <a href="http://abcnews.go.com/Health/story?id=5420269&amp;page=1">http://abcnews.go.com/Health/story?id=5420269&amp;page=1</a>                                                                                                                                             | Media Article                           |
|  | 15 | <a href="http://www.macworld.com.au/app-guide/calorie-counter-diet-tracker-59091/">http://www.macworld.com.au/app-guide/calorie-counter-diet-tracker-59091/</a>                                                                                                             | App                                     |
|  | 16 | <a href="http://www.cbc.ca/news/background/food/restaurant-tracker.html">http://www.cbc.ca/news/background/food/restaurant-tracker.html</a>                                                                                                                                 | Other                                   |
|  | 17 | <a href="https://itunes.apple.com/au/app/calorie-counter-diet-tracker/id341232718?mt=8">https://itunes.apple.com/au/app/calorie-counter-diet-tracker/id341232718?mt=8</a>                                                                                                   | App                                     |
|  | 18 | <a href="http://store.ovi.com/content/178820">http://store.ovi.com/content/178820</a>                                                                                                                                                                                       | App                                     |
|  | 19 | <a href="http://blog.programmableweb.com/2012/07/06/be-a-calorie-tracker-hacker-with-mynetdiary/">http://blog.programmableweb.com/2012/07/06/be-a-calorie-tracker-hacker-with-mynetdiary/</a>                                                                               | Other                                   |
|  | 20 | <a href="http://www.eatright.org/WorkArea/linkit.aspx?LinkIdentifier=id&amp;ItemID=6442467034&amp;libID=6442467016">http://www.eatright.org/WorkArea/linkit.aspx?LinkIdentifier=id&amp;ItemID=6442467034&amp;libID=6442467016</a>                                           | App                                     |
|  | 21 | <a href="https://itunes.apple.com/us/app/livestrong.com-calorie-tracker/id502317923?mt=8">https://itunes.apple.com/us/app/livestrong.com-calorie-tracker/id502317923?mt=8</a>                                                                                               | App                                     |
|  | 22 | <a href="https://itunes.apple.com/au/app/australian-calorie-counter/id436104108?mt=8">https://itunes.apple.com/au/app/australian-calorie-counter/id436104108?mt=8</a>                                                                                                       | App                                     |
|  | 23 | <a href="http://www.nytimes.com/2012/01/05/technology/personaltech/devices-to-keep-track-of-calories-lost-or-gained.html?pagewanted=all">http://www.nytimes.com/2012/01/05/technology/personaltech/devices-to-keep-track-of-calories-lost-or-gained.html?pagewanted=all</a> | Links to Online Health Program          |
|  | 24 | <a href="http://www.changemyplate.com/calorie-tracker/">http://www.changemyplate.com/calorie-tracker/</a>                                                                                                                                                                   | Physical activity Online Health program |
|  | 25 | <a href="http://www.findingoptimism.com/blog/apps/review-of-livestrong-calorie-tracker/">http://www.findingoptimism.com/blog/apps/review-of-livestrong-calorie-tracker/</a>                                                                                                 | App                                     |
|  | 26 | <a href="http://www.pcmag.com/article2/02817239335900.asp">http://www.pcmag.com/article2/02817239335900.asp</a>                                                                                                                                                             | Dead Link                               |
|  | 27 | <a href="http://www.shape.com/fitness/training-plans/best-free-apps-runners?page=6">http://www.shape.com/fitness/training-plans/best-free-apps-runners?page=6</a>                                                                                                           | Links to Online Health Program          |
|  | 28 | <a href="http://www.builtlean.com/2010/06/15/best-free-online-calorie-tracker-and-app/">http://www.builtlean.com/2010/06/15/best-free-online-calorie-tracker-and-app/</a>                                                                                                   | Links to Online Health Program          |
|  | 29 | <a href="http://www.macworld.com/product/79923/tap-track-calorie-tracker.html">http://www.macworld.com/product/79923/tap-track-calorie-tracker.html</a>                                                                                                                     | App                                     |
|  | 30 | <a href="http://www.alfitness.com.au/">http://www.alfitness.com.au/</a>                                                                                                                                                                                                     | Physical activity Online Health program |

|                      |   |                                                                                                                                                                             |                                         |
|----------------------|---|-----------------------------------------------------------------------------------------------------------------------------------------------------------------------------|-----------------------------------------|
| Free weight programs | 1 | <a href="http://tracker.dailyburn.com/workout_programs/55291-5-Day-Split-Free-Weights">http://tracker.dailyburn.com/workout_programs/55291-5-Day-Split-Free-Weights</a>     | Physical activity Online Health program |
|                      | 2 | <a href="http://tracker.dailyburn.com/workout_programs/34-All-Free-Weights">http://tracker.dailyburn.com/workout_programs/34-All-Free-Weights</a>                           | Physical activity Online Health program |
|                      | 3 | <a href="http://weighttraining.about.com/od/succeedingwithweights/a/strength_muscle.htm">http://weighttraining.about.com/od/succeedingwithweights/a/strength_muscle.htm</a> | Physical activity Online Health program |
|                      | 4 | <a href="http://www.trulyhuge.com/free_weights.htm">http://www.trulyhuge.com/free_weights.htm</a>                                                                           | Physical activity Online Health program |
|                      | 5 | <a href="http://www.realsolutionsmag.com/weight-training/">http://www.realsolutionsmag.com/weight-training/</a>                                                             | Physical activity Online Health program |
|                      | 6 | <a href="http://www.freedieting.com/">http://www.freedieting.com/</a>                                                                                                       | Links to Online Health Program          |
|                      | 7 | <a href="http://www.freetrainers.com/">http://www.freetrainers.com/</a>                                                                                                     | Physical activity Online Health program |

|  |    |                                                                                                                                                                                                                                                 |                                         |
|--|----|-------------------------------------------------------------------------------------------------------------------------------------------------------------------------------------------------------------------------------------------------|-----------------------------------------|
|  | 8  | <a href="http://www.sparkpeople.com/">http://www.sparkpeople.com/</a>                                                                                                                                                                           | Physical activity Online Health program |
|  | 9  | <a href="http://www.fitclick.com/">http://www.fitclick.com/</a>                                                                                                                                                                                 | Physical activity Online Health program |
|  | 10 | <a href="http://www.nowloss.com/free-weight-loss-workout-exercise-program.htm">http://www.nowloss.com/free-weight-loss-workout-exercise-program.htm</a>                                                                                         | Physical activity Online Health program |
|  | 11 | <a href="http://www.powerzonenuitrition.com.au/main/index.php?option=com_content&amp;view=article&amp;id=86&amp;Itemid=86">http://www.powerzonenuitrition.com.au/main/index.php?option=com_content&amp;view=article&amp;id=86&amp;Itemid=86</a> | Physical activity Online Health program |
|  | 12 | <a href="http://www.startyourdiet.com/">http://www.startyourdiet.com/</a>                                                                                                                                                                       | Physical activity Online Health program |
|  | 13 | <a href="http://fittplan.com/free-weights-workout-program">http://fittplan.com/free-weights-workout-program</a>                                                                                                                                 | Physical activity Online Health program |
|  | 14 | <a href="http://en.wikipedia.org/wiki/Weight_training">http://en.wikipedia.org/wiki/Weight_training</a>                                                                                                                                         | NGO health information                  |
|  | 15 | <a href="http://www.exercise4weightloss.com/free-weight-loss-programs.html">http://www.exercise4weightloss.com/free-weight-loss-programs.html</a>                                                                                               | Physical activity Online Health program |
|  | 16 | <a href="http://voices.yahoo.com/the-best-free-online-weight-loss-programs-5622216.html">http://voices.yahoo.com/the-best-free-online-weight-loss-programs-5622216.html</a>                                                                     | Links to Online Health Program          |
|  | 17 | <a href="http://43weightlossexercise.webs.com/">http://43weightlossexercise.webs.com/</a>                                                                                                                                                       | Links to Online Health Program          |
|  | 18 | <a href="http://www.muscleanstrength.com/workouts/main.html">http://www.muscleanstrength.com/workouts/main.html</a>                                                                                                                             | Physical activity Online Health program |
|  | 19 | <a href="http://www.personaltrainingprograms.com/">http://www.personaltrainingprograms.com/</a>                                                                                                                                                 | Physical activity Online Health program |
|  | 20 | <a href="http://hasfit.com/workouts/weight-loss/">http://hasfit.com/workouts/weight-loss/</a>                                                                                                                                                   | Physical activity Online Health program |
|  | 21 | <a href="http://www.freedieting.com/exercise_plans.htm">http://www.freedieting.com/exercise_plans.htm</a>                                                                                                                                       | Physical activity Online Health program |
|  | 22 | <a href="http://www.livestrong.com/free-weight-loss-programs/">http://www.livestrong.com/free-weight-loss-programs/</a>                                                                                                                         | Physical activity Online Health program |
|  | 23 | <a href="http://www.isowhey.com.au/assets/pdf/002_EbookIsoWhey_Booklet.pdf">http://www.isowhey.com.au/assets/pdf/002_EbookIsoWhey_Booklet.pdf</a>                                                                                               | Other                                   |
|  | 24 | <a href="http://www.dailymotion.com/video/x8yoli_free-weight-lifting-programs-offers_news">http://www.dailymotion.com/video/x8yoli_free-weight-lifting-programs-offers_news</a>                                                                 | Other                                   |
|  | 25 | <a href="http://www.dailymotion.com/video/x7ctvb_free-weight-loss-programs_news">http://www.dailymotion.com/video/x7ctvb_free-weight-loss-programs_news</a>                                                                                     | Other                                   |
|  | 26 | <a href="http://idealbody4life.com/free-weight-loss-exercise-programs">http://idealbody4life.com/free-weight-loss-exercise-programs</a>                                                                                                         | Physical activity Online Health program |
|  | 27 | <a href="http://www.menshealth.co.uk/lose-weight/">http://www.menshealth.co.uk/lose-weight/</a>                                                                                                                                                 | Physical activity Online Health program |
|  | 28 | <a href="http://www.facebook.com/pages/Free-Weight-Loss-Tips-and-Weight-Training-Programs/152097804800590">http://www.facebook.com/pages/Free-Weight-Loss-Tips-and-Weight-Training-Programs/152097804800590</a>                                 | Physical activity Online Health program |
|  | 29 | <a href="http://www.sallysymonds.com.au/free-stuff/47-resources/free-resources/58-the-best-free-online-diet-and-exercise">http://www.sallysymonds.com.au/free-stuff/47-resources/free-resources/58-the-best-free-online-diet-and-exercise</a>   | Links to Online Health Program          |
|  | 30 | <a href="http://www.hmrprogram.com/index.cfm/Programs/ClinicPrograms/Decision-Free_Program">http://www.hmrprogram.com/index.cfm/Programs/ClinicPrograms/Decision-Free_Program</a>                                                               | Non PA Online Health Program            |

|                     |   |                                                                                                                                                   |                                         |
|---------------------|---|---------------------------------------------------------------------------------------------------------------------------------------------------|-----------------------------------------|
| Weight loss program | 1 | <a href="http://www.weightloss.com.au/weight-loss-programs.html">http://www.weightloss.com.au/weight-loss-programs.html</a>                       | Physical activity Online Health program |
|                     | 2 | <a href="http://www.tonyferguson.com/">http://www.tonyferguson.com/</a>                                                                           | Non PA Online Health Program            |
|                     | 3 | <a href="http://www.bodytrim.com.au/">http://www.bodytrim.com.au/</a>                                                                             | Non PA Online Health Program            |
|                     | 4 | <a href="http://weightlossprogramsaustralia.com/">http://weightlossprogramsaustralia.com/</a>                                                     | Non PA Online Health Program            |
|                     | 5 | <a href="http://www.productreview.com.au/c/diets-weight-loss-programs.html">http://www.productreview.com.au/c/diets-weight-loss-programs.html</a> | Links to Online Health Program          |
|                     | 6 | <a href="http://www.sureslim.com.au/">http://www.sureslim.com.au/</a>                                                                             | Non PA Online Health Program            |
|                     | 7 | <a href="http://www.alfitness.com.au/">http://www.alfitness.com.au/</a>                                                                           | Physical activity Online Health program |

|  |    |                                                                                                                                                                                                                                                                                       |                                         |
|--|----|---------------------------------------------------------------------------------------------------------------------------------------------------------------------------------------------------------------------------------------------------------------------------------------|-----------------------------------------|
|  | 8  | <a href="http://www.wesweight.com.au/weight-loss-program">http://www.wesweight.com.au/weight-loss-program</a>                                                                                                                                                                         | Non PA Online Health Program            |
|  | 9  | <a href="http://www.jennycraig.com.au/weight-loss-programs">http://www.jennycraig.com.au/weight-loss-programs</a>                                                                                                                                                                     | Non PA Online Health Program            |
|  | 10 | <a href="http://www.ultralite.com.au/">http://www.ultralite.com.au/</a>                                                                                                                                                                                                               | Non PA Online Health Program            |
|  | 11 | <a href="http://www.smh.com.au/national/health/lifetime-of-dieting-is-the-new-weight-loss-plan-20121229-2c0l2.html">http://www.smh.com.au/national/health/lifetime-of-dieting-is-the-new-weight-loss-plan-20121229-2c0l2.html</a>                                                     | Non PA Online Health Program            |
|  | 12 | <a href="http://biggestloserclub.com.au/">http://biggestloserclub.com.au/</a>                                                                                                                                                                                                         | Physical activity Online Health program |
|  | 13 | <a href="http://www.fatblaster.com.au/weight-loss-program/">http://www.fatblaster.com.au/weight-loss-program/</a>                                                                                                                                                                     | Physical activity Online Health program |
|  | 14 | <a href="http://www.fatblaster.com.au/downloadWeightLossBooklet.php">http://www.fatblaster.com.au/downloadWeightLossBooklet.php</a>                                                                                                                                                   | Non PA Online Health Program            |
|  | 15 | <a href="http://www.orberasystem.com.au/">http://www.orberasystem.com.au/</a>                                                                                                                                                                                                         | Non PA Online Health Program            |
|  | 16 | <a href="http://www.bmiweightloss.com.au/">http://www.bmiweightloss.com.au/</a>                                                                                                                                                                                                       | Physical activity Online Health program |
|  | 17 | <a href="http://www.themainmeal.com.au/Red+meat+and+nutrition/Weight-loss-plan-young-women/">http://www.themainmeal.com.au/Red+meat+and+nutrition/Weight-loss-plan-young-women/</a>                                                                                                   | Non PA Online Health Program            |
|  | 18 | <a href="http://www.weightloss.com.au/diy-weight-loss-program.html">http://www.weightloss.com.au/diy-weight-loss-program.html</a>                                                                                                                                                     | Physical activity Online Health program |
|  | 19 | <a href="http://www.drims.com.au/">http://www.drims.com.au/</a>                                                                                                                                                                                                                       | Non PA Online Health Program            |
|  | 20 | <a href="http://www.bodybalancing.com.au/">http://www.bodybalancing.com.au/</a>                                                                                                                                                                                                       | Physical activity Online Health program |
|  | 21 | <a href="http://changinghabits.com.au/21-day-healthy-weight-loss-program">http://changinghabits.com.au/21-day-healthy-weight-loss-program</a>                                                                                                                                         | Non PA Online Health Program            |
|  | 22 | <a href="http://www.bupa.com.au/health-and-wellness/programs-and-support/living-well-programs/weight-management-program">http://www.bupa.com.au/health-and-wellness/programs-and-support/living-well-programs/weight-management-program</a>                                           | Physical activity Online Health program |
|  | 23 | <a href="http://www.cohens.com.au/our_program/about_cohens_weight_loss_program.htm">http://www.cohens.com.au/our_program/about_cohens_weight_loss_program.htm</a>                                                                                                                     | Non PA Online Health Program            |
|  | 24 | <a href="http://www.weightwatchers.com.au/plan/apr/index.aspx">http://www.weightwatchers.com.au/plan/apr/index.aspx</a>                                                                                                                                                               | Physical activity Online Health program |
|  | 25 | <a href="http://www.fitnessmagazine.com/weight-loss/plans/">http://www.fitnessmagazine.com/weight-loss/plans/</a>                                                                                                                                                                     | Physical activity Online Health program |
|  | 26 | <a href="https://www.treatyourselfwell.com.au/">https://www.treatyourselfwell.com.au/</a>                                                                                                                                                                                             | Physical activity Online Health program |
|  | 27 | <a href="http://www.wesweight.com.au/">http://www.wesweight.com.au/</a>                                                                                                                                                                                                               | Non PA Online Health Program            |
|  | 28 | <a href="http://www.eatingwell.com/nutrition_health/weight_loss_diet_plans/diet_meal_plans/7_day_diet_meal_plan_to_lose_weight_1200_calories">http://www.eatingwell.com/nutrition_health/weight_loss_diet_plans/diet_meal_plans/7_day_diet_meal_plan_to_lose_weight_1200_calories</a> | Non PA Online Health Program            |
|  | 29 | <a href="http://www.donnaandtora.com/programs/ultimate-weight-control-formula/">http://www.donnaandtora.com/programs/ultimate-weight-control-formula/</a>                                                                                                                             | Non PA Online Health Program            |
|  | 30 | <a href="http://amcal.begoodtoyourself.com.au/amcal/our-program/">http://amcal.begoodtoyourself.com.au/amcal/our-program/</a>                                                                                                                                                         | Physical activity Online Health program |

|                         |   |                                                                                                                                                                 |                                         |
|-------------------------|---|-----------------------------------------------------------------------------------------------------------------------------------------------------------------|-----------------------------------------|
| Online exercise program | 1 | <a href="http://www.trainwithmeonline.com/">http://www.trainwithmeonline.com/</a>                                                                               | Physical activity Online Health program |
|                         | 2 | <a href="http://www.warriorxfit.com/">http://www.warriorxfit.com/</a>                                                                                           | Physical activity Online Health program |
|                         | 3 | <a href="http://www.foxnews.com/health/2011/05/20/10-online-workout-programs/">http://www.foxnews.com/health/2011/05/20/10-online-workout-programs/</a>         | Links to Online Health Program          |
|                         | 4 | <a href="http://www.oobafit.com/">http://www.oobafit.com/</a>                                                                                                   | Physical activity Online Health program |
|                         | 5 | <a href="http://www.freetrainers.com/">http://www.freetrainers.com/</a>                                                                                         | Physical activity Online Health program |
|                         | 6 | <a href="http://www.askmen.com/top_10/fitness/top-10-online-workout-programs.html">http://www.askmen.com/top_10/fitness/top-10-online-workout-programs.html</a> | Links to Online Health Program          |
|                         | 7 | <a href="http://www.alfitness.com.au/">http://www.alfitness.com.au/</a>                                                                                         | Physical activity Online Health program |

|    |                                                                                                                       |                                                                                                                                                                                                                                               |                                         |
|----|-----------------------------------------------------------------------------------------------------------------------|-----------------------------------------------------------------------------------------------------------------------------------------------------------------------------------------------------------------------------------------------|-----------------------------------------|
|    | 8                                                                                                                     | <a href="http://www.physiotools.com/">http://www.physiotools.com/</a>                                                                                                                                                                         | Commercial software                     |
|    | 9                                                                                                                     | <a href="http://www.sallysymonds.com.au/free-stuff/47-resources/free-resources/58-the-best-free-online-diet-and-exercise">http://www.sallysymonds.com.au/free-stuff/47-resources/free-resources/58-the-best-free-online-diet-and-exercise</a> | Physical activity Online Health program |
|    | 10                                                                                                                    | <a href="http://www.idealbodiesonline.com/">http://www.idealbodiesonline.com/</a>                                                                                                                                                             | Physical activity Online Health program |
|    | 11                                                                                                                    | <a href="http://www.workoutsforyou.com/">http://www.workoutsforyou.com/</a>                                                                                                                                                                   | Physical activity Online Health program |
|    | 12                                                                                                                    | <a href="http://www.therehablab.com/">http://www.therehablab.com/</a>                                                                                                                                                                         | Commercial software                     |
|    | 13                                                                                                                    | <a href="http://www.proconditioning.com.au/">http://www.proconditioning.com.au/</a>                                                                                                                                                           | Commercial software                     |
|    | 14                                                                                                                    | <a href="http://www.proconditioning.com.au/index.php?option=com_content&amp;view=article&amp;id=76&amp;Itemid=79">http://www.proconditioning.com.au/index.php?option=com_content&amp;view=article&amp;id=76&amp;Itemid=79</a>                 | Commercial software                     |
|    | 15                                                                                                                    | <a href="http://physicaltherapyweb.com/exercise_prescription_software.php">http://physicaltherapyweb.com/exercise_prescription_software.php</a>                                                                                               | Commercial software                     |
|    | 16                                                                                                                    | <a href="http://www.physiotec.ca/">http://www.physiotec.ca/</a>                                                                                                                                                                               | Commercial software                     |
|    | 17                                                                                                                    | <a href="http://www.workouttrainer.com/">http://www.workouttrainer.com/</a>                                                                                                                                                                   | Physical activity Online Health program |
|    | 18                                                                                                                    | <a href="http://www.slimtree.com/">http://www.slimtree.com/</a>                                                                                                                                                                               | Physical activity Online Health program |
|    | 19                                                                                                                    | <a href="http://www.intrafitt.com/">http://www.intrafitt.com/</a>                                                                                                                                                                             | Physical activity Online Health program |
|    | 20                                                                                                                    | <a href="http://www.workoutz.com/">http://www.workoutz.com/</a>                                                                                                                                                                               | Physical activity Online Health program |
|    | 21                                                                                                                    | <a href="http://www.makeuseof.com/tag/3-great-online-fitness-programs-shape/">http://www.makeuseof.com/tag/3-great-online-fitness-programs-shape/</a>                                                                                         | Links to Online Health Program          |
|    | 22                                                                                                                    | <a href="http://www.sportecoach.com.au/online-training-programs.html">http://www.sportecoach.com.au/online-training-programs.html</a>                                                                                                         | Physical activity Online Health program |
|    | 23                                                                                                                    | <a href="http://www.sparkpeople.com/resource/videos.asp">http://www.sparkpeople.com/resource/videos.asp</a>                                                                                                                                   | Physical activity Online Health program |
|    | 24                                                                                                                    | <a href="http://www.myexerciseplan.com/">http://www.myexerciseplan.com/</a>                                                                                                                                                                   | Physical activity Online Health program |
|    | 25                                                                                                                    | <a href="http://www.dailymail.co.uk/health/fitnessWorkOutArms.html">http://www.dailymail.co.uk/health/fitnessWorkOutArms.html</a>                                                                                                             | Physical activity Online Health program |
|    | 26                                                                                                                    | <a href="http://online-fitness-services-review.toptenreviews.com/">http://online-fitness-services-review.toptenreviews.com/</a>                                                                                                               | Links to Online Health Program          |
|    | 27                                                                                                                    | <a href="http://www.hep2go.com/">http://www.hep2go.com/</a>                                                                                                                                                                                   | Commercial software                     |
| 28 | <a href="http://www.gymamerica.com/">http://www.gymamerica.com/</a>                                                   | Physical activity Online Health program                                                                                                                                                                                                       |                                         |
| 29 | <a href="http://www.myhomepersonaltrainer.com/home/index.htm">http://www.myhomepersonaltrainer.com/home/index.htm</a> | Physical activity Online Health program                                                                                                                                                                                                       |                                         |
| 30 | <a href="http://www.fitwatch.com/planner/workoutplanner.html">http://www.fitwatch.com/planner/workoutplanner.html</a> | Physical activity Online Health program                                                                                                                                                                                                       |                                         |

|                          |   |                                                                                                                                                                                                         |                                |
|--------------------------|---|---------------------------------------------------------------------------------------------------------------------------------------------------------------------------------------------------------|--------------------------------|
| Health tracking software | 1 | <a href="http://www.mindmehealth.com/blog/tags/tag/health-tracking-software-1">http://www.mindmehealth.com/blog/tags/tag/health-tracking-software-1</a>                                                 | Life coaching                  |
|                          | 2 | <a href="http://download.cnet.com/Health-Tracker/3000-2129_4-73404.html">http://download.cnet.com/Health-Tracker/3000-2129_4-73404.html</a>                                                             | App                            |
|                          | 3 | <a href="http://howto.wired.com/wiki/Use_Tech_to_Track_Your_Health">http://howto.wired.com/wiki/Use_Tech_to_Track_Your_Health</a>                                                                       | Links to Online Health Program |
|                          | 4 | <a href="http://www.ilovefreeware.com/21/windows/free-health-tracking-software-my-daily-readings.html">http://www.ilovefreeware.com/21/windows/free-health-tracking-software-my-daily-readings.html</a> | Profile page                   |
|                          | 5 | <a href="http://www.facebook.com/benutriwise">http://www.facebook.com/benutriwise</a>                                                                                                                   | Profile page                   |
|                          | 6 | <a href="http://www.omronhealthcare.com/service-and-support/connected-health/">http://www.omronhealthcare.com/service-and-support/connected-health/</a>                                                 | Profile page                   |
|                          | 7 | <a href="http://mashable.com/2011/11/06/apps-health-productivity/">http://mashable.com/2011/11/06/apps-health-productivity/</a>                                                                         | Links to Online Health Program |
|                          | 8 | <a href="http://www.healthtrack.com.au/">http://www.healthtrack.com.au/</a>                                                                                                                             | Profile page                   |
|                          | 9 | <a href="http://www.integritas.com/employee-health-software.html">http://www.integritas.com/employee-health-software.html</a>                                                                           | Profile page                   |

|  |    |                                                                                                                                                                                                                                               |                                         |
|--|----|-----------------------------------------------------------------------------------------------------------------------------------------------------------------------------------------------------------------------------------------------|-----------------------------------------|
|  | 10 | <a href="http://ieeexplore.ieee.org/xpl/articleDetails.jsp?reload=true&amp;arnumber=336779">http://ieeexplore.ieee.org/xpl/articleDetails.jsp?reload=true&amp;arnumber=336779</a>                                                             | Research article                        |
|  | 11 | <a href="http://www.cdc.gov/nceh/tracking/pdfs/how_to_guide.pdf">http://www.cdc.gov/nceh/tracking/pdfs/how_to_guide.pdf</a>                                                                                                                   | Research article                        |
|  | 12 | <a href="http://www.puresafety.com/public/products-services/occupational-health-manager-ohm">http://www.puresafety.com/public/products-services/occupational-health-manager-ohm</a>                                                           | Profile page                            |
|  | 13 | <a href="http://www.techsoftwaremarket.com/health-tracking-app/">http://www.techsoftwaremarket.com/health-tracking-app/</a>                                                                                                                   | Other                                   |
|  | 14 | <a href="https://play.google.com/store/apps/details?id=com.benoved.phr_lite">https://play.google.com/store/apps/details?id=com.benoved.phr_lite</a>                                                                                           | App                                     |
|  | 15 | <a href="http://readysset.axionhealth.com/">http://readysset.axionhealth.com/</a>                                                                                                                                                             | Other                                   |
|  | 16 | <a href="http://www.seratec.com.au/industry/local_council/council-health-inspection-tracking-software.htm">http://www.seratec.com.au/industry/local_council/council-health-inspection-tracking-software.htm</a>                               | Other                                   |
|  | 17 | <a href="http://mobile.brothersoft.com/download/health-tracker.html">http://mobile.brothersoft.com/download/health-tracker.html</a>                                                                                                           | Other                                   |
|  | 18 | <a href="http://ieeexplore.ieee.org/xpls/abs_all.jsp?arnumber=336779">http://ieeexplore.ieee.org/xpls/abs_all.jsp?arnumber=336779</a>                                                                                                         | Other                                   |
|  | 19 | <a href="http://www.cbsnews.com/2100-500165_162-6417556.html">http://www.cbsnews.com/2100-500165_162-6417556.html</a>                                                                                                                         | Links to Online Health Program          |
|  | 20 | <a href="http://www.recordsforliving.com/HealthFrame/Feature_ExpenseTracking.aspx">http://www.recordsforliving.com/HealthFrame/Feature_ExpenseTracking.aspx</a>                                                                               | Other                                   |
|  | 21 | <a href="http://www.youtube.com/user/HowsMyPet/videos">http://www.youtube.com/user/HowsMyPet/videos</a>                                                                                                                                       | Other                                   |
|  | 22 | <a href="http://branch.com/b/why-does-almost-all-health-tracking-software-hardware-suck?ref=just_started">http://branch.com/b/why-does-almost-all-health-tracking-software-hardware-suck?ref=just_started</a>                                 | Other                                   |
|  | 23 | <a href="http://www.forbes.com/forbes/2010/1206/investment-guide-medical-spending-health-care-tracking-vital-signs.html">http://www.forbes.com/forbes/2010/1206/investment-guide-medical-spending-health-care-tracking-vital-signs.html</a>   | Other                                   |
|  | 24 | <a href="http://www.fitstatsweb.com/">http://www.fitstatsweb.com/</a>                                                                                                                                                                         | Commercial software                     |
|  | 25 | <a href="http://www.tanita.com/en/tanita-health-ware/">http://www.tanita.com/en/tanita-health-ware/</a>                                                                                                                                       | Profile page                            |
|  | 26 | <a href="http://pctsrjmedical.raj.nic.in/">http://pctsrjmedical.raj.nic.in/</a>                                                                                                                                                               | Research article                        |
|  | 27 | <a href="http://venturebeat.com/2012/11/29/basis-science-reveals-its-health-tracking-wristwatch-and-fitness-web-service/">http://venturebeat.com/2012/11/29/basis-science-reveals-its-health-tracking-wristwatch-and-fitness-web-service/</a> | Links to Online Health Program          |
|  | 28 | <a href="http://www.cdc.gov/nceh/tracking/">http://www.cdc.gov/nceh/tracking/</a>                                                                                                                                                             | Government health information           |
|  | 29 | <a href="http://forums.anandtech.com/showthread.php?p=34328611">http://forums.anandtech.com/showthread.php?p=34328611</a>                                                                                                                     | Other                                   |
|  | 30 | <a href="http://www.weightbydate.com/pro_overview_fitness.htm">http://www.weightbydate.com/pro_overview_fitness.htm</a>                                                                                                                       | Physical activity Online Health program |

|                               |   |                                                                                                                                                                                                     |                               |
|-------------------------------|---|-----------------------------------------------------------------------------------------------------------------------------------------------------------------------------------------------------|-------------------------------|
| Environmental health tracking | 1 | <a href="http://www.cdc.gov/nceh/tracking/">http://www.cdc.gov/nceh/tracking/</a>                                                                                                                   | Government health information |
|                               | 2 | <a href="http://ephtracking.cdc.gov/">http://ephtracking.cdc.gov/</a>                                                                                                                               | Government health information |
|                               | 3 | <a href="http://www.public.health.wa.gov.au/2/1398/2/environmental_health_surveillance.pm">http://www.public.health.wa.gov.au/2/1398/2/environmental_health_surveillance.pm</a>                     | Government health information |
|                               | 4 | <a href="https://tracking.publichealth.maine.gov/">https://tracking.publichealth.maine.gov/</a>                                                                                                     | Government health information |
|                               | 5 | <a href="http://www.cehtp.org/">http://www.cehtp.org/</a>                                                                                                                                           | Government health information |
|                               | 6 | <a href="http://healthvermont.gov/tracking/">http://healthvermont.gov/tracking/</a>                                                                                                                 | Government health information |
|                               | 7 | <a href="http://www.hpa.org.uk/ProductsServices/ChemicalsPoisons/EnvironmentalPublicHealthTracking/">http://www.hpa.org.uk/ProductsServices/ChemicalsPoisons/EnvironmentalPublicHealthTracking/</a> | Government health information |
|                               | 8 | <a href="http://www.jhsph.edu/research/centers-and-institutes/center-for-">http://www.jhsph.edu/research/centers-and-institutes/center-for-</a>                                                     | Government health information |

|  |    |                                                                                                                                                                                                                                           |                               |
|--|----|-------------------------------------------------------------------------------------------------------------------------------------------------------------------------------------------------------------------------------------------|-------------------------------|
|  |    | <a href="http://excellence-in-environmental-health-tracking/index.html">excellence-in-environmental-health-tracking/index.html</a>                                                                                                        |                               |
|  | 9  | <a href="http://ehtracking.berkeley.edu/">http://ehtracking.berkeley.edu/</a>                                                                                                                                                             | NGO health information        |
|  | 10 | <a href="http://www.health.state.mn.us/tracking/">http://www.health.state.mn.us/tracking/</a>                                                                                                                                             | Government health information |
|  | 11 | <a href="http://www.facebook.com/CDCEPHTracking">http://www.facebook.com/CDCEPHTracking</a>                                                                                                                                               | Profile page                  |
|  | 12 | <a href="http://a816-dohbsp.nyc.gov/IndicatorPublic/">http://a816-dohbsp.nyc.gov/IndicatorPublic/</a>                                                                                                                                     | Government health information |
|  | 13 | <a href="http://www.health.ny.gov/statistics/environmental/public_health_tracking/">http://www.health.ny.gov/statistics/environmental/public_health_tracking/</a>                                                                         | Government health information |
|  | 14 | <a href="http://public.health.oregon.gov/HealthyEnvironments/EnvironmentalExposures/EnvironmentalPublicHealthTracking/">http://public.health.oregon.gov/HealthyEnvironments/EnvironmentalExposures/EnvironmentalPublicHealthTracking/</a> | Research article              |
|  | 15 | <a href="http://www.portal.state.pa.us/portal/server.pt?open=514&amp;objID=557488&amp;mode=2">http://www.portal.state.pa.us/portal/server.pt?open=514&amp;objID=557488&amp;mode=2</a>                                                     | Government health information |
|  | 16 | <a href="http://esriaustralia.com.au/u/lib/cms/esri-health_whitepaper.pdf">http://esriaustralia.com.au/u/lib/cms/esri-health_whitepaper.pdf</a>                                                                                           | Research article              |
|  | 17 | <a href="http://www.cdc.gov/features/trackingnetwork/">http://www.cdc.gov/features/trackingnetwork/</a>                                                                                                                                   | Government health information |
|  | 18 | <a href="http://www.naccho.org/topics/environmental/EPHT/index.cfm">http://www.naccho.org/topics/environmental/EPHT/index.cfm</a>                                                                                                         | Government health information |
|  | 19 | <a href="http://www.ncbi.nlm.nih.gov/pmc/articles/PMC2653708/">http://www.ncbi.nlm.nih.gov/pmc/articles/PMC2653708/</a>                                                                                                                   | Research article              |
|  | 20 | <a href="http://ideha.dhmdh.maryland.gov/OEHFP/EH/tracking/SitePages/Home.aspx">http://ideha.dhmdh.maryland.gov/OEHFP/EH/tracking/SitePages/Home.aspx</a>                                                                                 | Government health information |
|  | 21 | <a href="http://www.naphsis.org/Pages/EnvironmentalPublicHealthTrackingOV.aspx">http://www.naphsis.org/Pages/EnvironmentalPublicHealthTrackingOV.aspx</a>                                                                                 | Government health information |
|  | 22 | <a href="http://www.dh.sa.gov.au/pehs/publications/0812-EH-indicators-discussion-paper.pdf">http://www.dh.sa.gov.au/pehs/publications/0812-EH-indicators-discussion-paper.pdf</a>                                                         | Research article              |
|  | 23 | <a href="http://www.cddep.org/projects/cdc_environmental_public_health_tracking_network_evaluation">http://www.cddep.org/projects/cdc_environmental_public_health_tracking_network_evaluation</a>                                         | Government health information |
|  | 24 | <a href="http://www.scdhec.gov/administration/epht/">http://www.scdhec.gov/administration/epht/</a>                                                                                                                                       | Government health information |
|  | 25 | <a href="http://matracking.ehs.state.ma.us/">http://matracking.ehs.state.ma.us/</a>                                                                                                                                                       | Government health information |
|  | 26 | <a href="http://www.coepht.dphe.state.co.us/">http://www.coepht.dphe.state.co.us/</a>                                                                                                                                                     | Government health information |
|  | 27 | <a href="http://ephttracking.cdc.gov/showPopCharEnv.action">http://ephttracking.cdc.gov/showPopCharEnv.action</a>                                                                                                                         | Government health information |
|  | 28 | <a href="http://www.nbdpn.org/docs/TuesBreakout_330PM_EPHT_Strosnider_WEB.pdf">http://www.nbdpn.org/docs/TuesBreakout_330PM_EPHT_Strosnider_WEB.pdf</a>                                                                                   | Research article              |
|  | 29 | <a href="http://www.ncbi.nlm.nih.gov/pmc/articles/PMC1247569/">http://www.ncbi.nlm.nih.gov/pmc/articles/PMC1247569/</a>                                                                                                                   | Research article              |
|  | 30 | <a href="http://www.ct.gov/dph/cwp/view.asp?a=3140&amp;q=386922&amp;dphNav_GID=1826">http://www.ct.gov/dph/cwp/view.asp?a=3140&amp;q=386922&amp;dphNav_GID=1826</a>                                                                       | Government health information |

|                        |   |                                                                                                                                                                                                                 |                                         |
|------------------------|---|-----------------------------------------------------------------------------------------------------------------------------------------------------------------------------------------------------------------|-----------------------------------------|
| Online health tracking | 1 | <a href="http://online.wsj.com/article/SB10001424052702304180804575188402688763416.html">http://online.wsj.com/article/SB10001424052702304180804575188402688763416.html</a>                                     | Links to Online Health Program          |
|                        | 2 | <a href="http://greatist.com/health/complete-guide-to-tracking-health-and-fitness-online/">http://greatist.com/health/complete-guide-to-tracking-health-and-fitness-online/</a>                                 | Links to Online Health Program          |
|                        | 3 | <a href="http://mashable.com/2011/09/23/the-complete-guide-to-tracking-health-fitness-online-infographic/">http://mashable.com/2011/09/23/the-complete-guide-to-tracking-health-fitness-online-infographic/</a> | Links to Online Health Program          |
|                        | 4 | <a href="http://www.preventionhealthtracker.com.au/">http://www.preventionhealthtracker.com.au/</a>                                                                                                             | Physical activity Online Health program |
|                        | 5 | <a href="http://www.healthehuman.com/">http://www.healthehuman.com/</a>                                                                                                                                         | Physical activity Online Health program |



|  |    |                                                                                                                                                                                                                                                                                                                                         |                                         |
|--|----|-----------------------------------------------------------------------------------------------------------------------------------------------------------------------------------------------------------------------------------------------------------------------------------------------------------------------------------------|-----------------------------------------|
|  | 6  | <a href="https://www.heart360.org/">https://www.heart360.org/</a>                                                                                                                                                                                                                                                                       | Physical activity Online Health program |
|  | 7  | <a href="http://www.msnbc.msn.com/id/16526412/ns/health-heart_health/t/online-tracker-monitors-calories-exercise/">http://www.msnbc.msn.com/id/16526412/ns/health-heart_health/t/online-tracker-monitors-calories-exercise/</a>                                                                                                         | Media Article                           |
|  | 8  | <a href="http://www.thehealthcaregroup.com.au/pages/corporate/services/online-health-tracking-program.php">http://www.thehealthcaregroup.com.au/pages/corporate/services/online-health-tracking-program.php</a>                                                                                                                         | Physical activity Online Health program |
|  | 9  | <a href="https://myupmc.upmc.com/">https://myupmc.upmc.com/</a>                                                                                                                                                                                                                                                                         | Other                                   |
|  | 10 | <a href="http://www.governmenttechnology.co.uk/gt-news/item/2519-uks-first-online-health-tracker-launched">http://www.governmenttechnology.co.uk/gt-news/item/2519-uks-first-online-health-tracker-launched</a>                                                                                                                         | Other                                   |
|  | 11 | <a href="http://www.shapeup.com/news/article/shapeup-enhances-online-health-tracking-with-bodymedia-fit-armband-system-l">http://www.shapeup.com/news/article/shapeup-enhances-online-health-tracking-with-bodymedia-fit-armband-system-l</a>                                                                                           | Physical activity Online Health program |
|  | 12 | <a href="http://lifeboat.com/blog/2009/01/the-new-rise-of-online-health-tracking">http://lifeboat.com/blog/2009/01/the-new-rise-of-online-health-tracking</a>                                                                                                                                                                           | Links to Online Health Program          |
|  | 13 | <a href="http://www.hwia.com.au/pages/my-health-my-responsibility.php">http://www.hwia.com.au/pages/my-health-my-responsibility.php</a>                                                                                                                                                                                                 | Links to Online Health Program          |
|  | 14 | <a href="http://www.pewinternet.org/Reports/2011/Social-Life-of-Health-Info.aspx">http://www.pewinternet.org/Reports/2011/Social-Life-of-Health-Info.aspx</a>                                                                                                                                                                           | Research article                        |
|  | 15 | <a href="http://www.pnewswire.com/news-releases/basis-health-tracker-and-web-service-reveals-new-way-to-make-lasting-improvements-to-fitness-and-sleep-181359501.html">http://www.pnewswire.com/news-releases/basis-health-tracker-and-web-service-reveals-new-way-to-make-lasting-improvements-to-fitness-and-sleep-181359501.html</a> | Links to Online Health Program          |
|  | 16 | <a href="http://tarasabo.blogspot.com/2012/01/tracking-your-health-and-fitness-online.html">http://tarasabo.blogspot.com/2012/01/tracking-your-health-and-fitness-online.html</a>                                                                                                                                                       | Other                                   |
|  | 17 | <a href="http://www.prevention.com/">http://www.prevention.com/</a>                                                                                                                                                                                                                                                                     | Physical activity Online Health program |
|  | 18 | <a href="https://healthmanager.mayoclinic.com/help.aspx">https://healthmanager.mayoclinic.com/help.aspx</a>                                                                                                                                                                                                                             | Other                                   |
|  | 19 | <a href="http://www.chartmyself.com/">http://www.chartmyself.com/</a>                                                                                                                                                                                                                                                                   | Physical activity Online Health program |
|  | 20 | <a href="http://www.zeroonezero.com/design/website-copywriting/toni/online-health-tracking/">http://www.zeroonezero.com/design/website-copywriting/toni/online-health-tracking/</a>                                                                                                                                                     | Other                                   |
|  | 21 | <a href="http://pctsrjmedical.raj.nic.in/">http://pctsrjmedical.raj.nic.in/</a>                                                                                                                                                                                                                                                         | Other                                   |
|  | 22 | <a href="http://www.wellsorce.com/health-activity-tracker.html">http://www.wellsorce.com/health-activity-tracker.html</a>                                                                                                                                                                                                               | Physical activity Online Health program |
|  | 23 | <a href="http://powerinfographics.wordpress.com/2013/01/06/guide-for-tracking-your-health-and-fitness-online/">http://powerinfographics.wordpress.com/2013/01/06/guide-for-tracking-your-health-and-fitness-online/</a>                                                                                                                 | Dead Link                               |
|  | 24 | <a href="http://www.heart.org/HEARTORG/Conditions/More/ToolsForYourHeartHealth/Keep-Track-of-Your-Heart-Health_UCM_318041_Article.jsp">http://www.heart.org/HEARTORG/Conditions/More/ToolsForYourHeartHealth/Keep-Track-of-Your-Heart-Health_UCM_318041_Article.jsp</a>                                                                 | Physical activity Online Health program |
|  | 25 | <a href="http://www.icpsr.umich.edu/icpsrweb/ICPSR/series/161">http://www.icpsr.umich.edu/icpsrweb/ICPSR/series/161</a>                                                                                                                                                                                                                 | Research article                        |
|  | 26 | <a href="http://www.medhelp.org/land/health-trackers">http://www.medhelp.org/land/health-trackers</a>                                                                                                                                                                                                                                   | Links to Online Health Program          |
|  | 27 | <a href="http://www.pewinternet.org/Shared-Content/Data-Sets/2010/September-2010--Health.aspx">http://www.pewinternet.org/Shared-Content/Data-Sets/2010/September-2010--Health.aspx</a>                                                                                                                                                 | Links to Online Health Program          |
|  | 28 | <a href="http://www.cmbinfo.com/cmb-cms/wp-content/uploads/2012/11/Match.com_CaseStudy.pdf">http://www.cmbinfo.com/cmb-cms/wp-content/uploads/2012/11/Match.com_CaseStudy.pdf</a>                                                                                                                                                       | Other                                   |
|  | 29 | <a href="http://health.adelaide.edu.au/tracking/">http://health.adelaide.edu.au/tracking/</a>                                                                                                                                                                                                                                           | Other                                   |
|  | 30 | <a href="http://venturebeat.com/2012/11/29/basis-science-reveals-its-health-tracking-wristwatch-and-fitness-web-service/">http://venturebeat.com/2012/11/29/basis-science-reveals-its-health-tracking-wristwatch-and-fitness-web-service/</a>                                                                                           | Links to Online Health Program          |

|                     |   |                                                                                                                                                                                   |     |
|---------------------|---|-----------------------------------------------------------------------------------------------------------------------------------------------------------------------------------|-----|
| GPS walking tracker | 1 | <a href="https://itunes.apple.com/au/app/walk-tracker-gps-fitness-tracker/id453030204?mt=8">https://itunes.apple.com/au/app/walk-tracker-gps-fitness-tracker/id453030204?mt=8</a> | App |
|---------------------|---|-----------------------------------------------------------------------------------------------------------------------------------------------------------------------------------|-----|

|    |                                                                                                                                                                                                                                 |                                |
|----|---------------------------------------------------------------------------------------------------------------------------------------------------------------------------------------------------------------------------------|--------------------------------|
| 2  | <a href="https://itunes.apple.com/au/app/walk-watch-gps-walking-computer/id384877736?mt=8">https://itunes.apple.com/au/app/walk-watch-gps-walking-computer/id384877736?mt=8</a>                                                 | App                            |
| 3  | <a href="http://walking.about.com/od/pedometer1/tp/gadgets.htm">http://walking.about.com/od/pedometer1/tp/gadgets.htm</a>                                                                                                       | Other                          |
| 4  | <a href="http://www.walkgps.com/GPS%20Navigation.htm">http://www.walkgps.com/GPS%20Navigation.htm</a>                                                                                                                           | Other                          |
| 5  | <a href="https://play.google.com/store/apps/details?id=com.charsoftware.android.gps.walkandruntracker&amp;hl=en">https://play.google.com/store/apps/details?id=com.charsoftware.android.gps.walkandruntracker&amp;hl=en</a>     | App                            |
| 6  | <a href="https://play.google.com/store/apps/details?id=com.fitnesskeeper.runkeeper.pro&amp;hl=en">https://play.google.com/store/apps/details?id=com.fitnesskeeper.runkeeper.pro&amp;hl=en</a>                                   | App                            |
| 7  | <a href="http://www.garmin.com/uk/company/about_us/">http://www.garmin.com/uk/company/about_us/</a>                                                                                                                             | Profile page                   |
| 8  | <a href="http://gpstracklog.com/buyers-guides/gps-for-hiking">http://gpstracklog.com/buyers-guides/gps-for-hiking</a>                                                                                                           | Other                          |
| 9  | <a href="http://www.digitalworldz.co.uk/260168-android-gps-tracker-walking.html">http://www.digitalworldz.co.uk/260168-android-gps-tracker-walking.html</a>                                                                     | Other                          |
| 10 | <a href="http://uk.answers.yahoo.com/question/index?qid=20110405135919AAwPfAj">http://uk.answers.yahoo.com/question/index?qid=20110405135919AAwPfAj</a>                                                                         | Links to Online Health Program |
| 11 | <a href="http://uk.answers.yahoo.com/question/index?qid=20100131144718AAKVAAk">http://uk.answers.yahoo.com/question/index?qid=20100131144718AAKVAAk</a>                                                                         | Other                          |
| 12 | <a href="http://mobile.brothersoft.com/gps-walk-and-run-tracker-74503.html">http://mobile.brothersoft.com/gps-walk-and-run-tracker-74503.html</a>                                                                               | App                            |
| 13 | <a href="https://getsatisfaction.com/swingbyswing/topics/gps_walking_tracker_cool">https://getsatisfaction.com/swingbyswing/topics/gps_walking_tracker_cool</a>                                                                 | App                            |
| 14 | <a href="http://androidforums.com/htc-hero/37495-looking-accurate-walking-gps-tracker.html">http://androidforums.com/htc-hero/37495-looking-accurate-walking-gps-tracker.html</a>                                               | App                            |
| 15 | <a href="http://gps-tracker-review.toptenreviews.com/ecco-personal-gps-locator-review.html">http://gps-tracker-review.toptenreviews.com/ecco-personal-gps-locator-review.html</a>                                               | Other                          |
| 16 | <a href="http://pathtracks.com/">http://pathtracks.com/</a>                                                                                                                                                                     | App                            |
| 17 | <a href="https://itunes.apple.com/au/app/mapmywalk-gps-walking/id307861492?mt=8">https://itunes.apple.com/au/app/mapmywalk-gps-walking/id307861492?mt=8</a>                                                                     | App                            |
| 18 | <a href="http://trails.lamouroux.de/">http://trails.lamouroux.de/</a>                                                                                                                                                           | App                            |
| 19 | <a href="http://handheld.softpedia.com/get/GPS/GPS-Sport-Tracker-92379.shtml">http://handheld.softpedia.com/get/GPS/GPS-Sport-Tracker-92379.shtml</a>                                                                           | App                            |
| 20 | <a href="http://www.outdoorsafetygps.com/">http://www.outdoorsafetygps.com/</a>                                                                                                                                                 | Other                          |
| 21 | <a href="http://news.idealco.uk/news/2756/gps-tracking-watches.html">http://news.idealco.uk/news/2756/gps-tracking-watches.html</a>                                                                                             | Other                          |
| 22 | <a href="http://home.trainingpeaks.com/mobile-apps/iphone-trainingpeaks-gps.aspx">http://home.trainingpeaks.com/mobile-apps/iphone-trainingpeaks-gps.aspx</a>                                                                   | App                            |
| 23 | <a href="http://appshopper.com/healthcare-fitness/walkwatch-gps-walking-computer-for-tracking-mapping-and-fitness">http://appshopper.com/healthcare-fitness/walkwatch-gps-walking-computer-for-tracking-mapping-and-fitness</a> | App                            |
| 24 | <a href="http://www.optimaltracking.com/en/gps-randonnees-plein-air">http://www.optimaltracking.com/en/gps-randonnees-plein-air</a>                                                                                             | Other                          |
| 25 | <a href="http://gps-tracker-review.toptenreviews.com/">http://gps-tracker-review.toptenreviews.com/</a>                                                                                                                         | Other                          |
| 26 | <a href="http://www.alibaba.com/showroom/walking-tracker.html">http://www.alibaba.com/showroom/walking-tracker.html</a>                                                                                                         | Other                          |
| 27 | <a href="https://itunes.apple.com/en/app/walktastic-gps-nordic-walking/id380335165?mt=8">https://itunes.apple.com/en/app/walktastic-gps-nordic-walking/id380335165?mt=8</a>                                                     | App                            |
| 28 | <a href="http://www.freewarepocketpc.net/ppc-download-gps-sport-tracker.html">http://www.freewarepocketpc.net/ppc-download-gps-sport-tracker.html</a>                                                                           | App                            |
| 29 | <a href="http://www.petchecktechnology.com/">http://www.petchecktechnology.com/</a>                                                                                                                                             | Other                          |
| 30 | <a href="http://www.aliexpress.com/wholesale/wholesale-walking-tracker.html">http://www.aliexpress.com/wholesale/wholesale-walking-tracker.html</a>                                                                             | Other                          |

|                      |    |                                                                                                                                                                                                                             |                                         |
|----------------------|----|-----------------------------------------------------------------------------------------------------------------------------------------------------------------------------------------------------------------------------|-----------------------------------------|
| Walking Tracking App | 1  | <a href="https://itunes.apple.com/us/app/walk-tracker-pro/id423400390?mt=8">https://itunes.apple.com/us/app/walk-tracker-pro/id423400390?mt=8</a>                                                                           | App                                     |
|                      | 2  | <a href="https://itunes.apple.com/us/app/mapmywalk-gps-walking/id307861492?mt=8">https://itunes.apple.com/us/app/mapmywalk-gps-walking/id307861492?mt=8</a>                                                                 | App                                     |
|                      | 3  | <a href="https://play.google.com/store/apps/details?id=com.charsoftware.android.gps.walkandruntracker&amp;hl=en">https://play.google.com/store/apps/details?id=com.charsoftware.android.gps.walkandruntracker&amp;hl=en</a> | App                                     |
|                      | 4  | <a href="https://play.google.com/store/apps/details?id=com.highwaynorth.jogtracker&amp;hl=en">https://play.google.com/store/apps/details?id=com.highwaynorth.jogtracker&amp;hl=en</a>                                       | App                                     |
|                      | 5  | <a href="https://play.google.com/store/apps/details?id=com.endomondo.android&amp;hl=en">https://play.google.com/store/apps/details?id=com.endomondo.android&amp;hl=en</a>                                                   | App                                     |
|                      | 6  | <a href="http://walking.about.com/od/maps/tp/Best-Walking-App-Readers-Choice-Awards-2012.htm">http://walking.about.com/od/maps/tp/Best-Walking-App-Readers-Choice-Awards-2012.htm</a>                                       | App                                     |
|                      | 7  | <a href="http://www.abvio.com/walkmeter/">http://www.abvio.com/walkmeter/</a>                                                                                                                                               | App                                     |
|                      | 8  | <a href="http://www.mapmywalk.com/">http://www.mapmywalk.com/</a>                                                                                                                                                           | App                                     |
|                      | 9  | <a href="http://www.mapmywalk.com/imapmy/iphone/">http://www.mapmywalk.com/imapmy/iphone/</a>                                                                                                                               | App                                     |
|                      | 10 | <a href="http://support.trainingpeaks.com/trainingpeaks-apps/trainingpeaks-gps-apps/walktracker-pro.aspx">http://support.trainingpeaks.com/trainingpeaks-apps/trainingpeaks-gps-apps/walktracker-pro.aspx</a>               | App                                     |
|                      | 11 | <a href="http://apple.stackexchange.com/questions/51883/whats-a-good-sports-tracker-app-for-iphone">http://apple.stackexchange.com/questions/51883/whats-a-good-sports-tracker-app-for-iphone</a>                           | App                                     |
|                      | 12 | <a href="http://www.appszoom.com/android_applications/gps+walk+and+run+tracker">http://www.appszoom.com/android_applications/gps+walk+and+run+tracker</a>                                                                   | App                                     |
|                      | 13 | <a href="http://www.jogtracker.com/">http://www.jogtracker.com/</a>                                                                                                                                                         | App                                     |
|                      | 14 | <a href="http://appshopper.com/mac/healthcare-fitness/walk-tracker">http://appshopper.com/mac/healthcare-fitness/walk-tracker</a>                                                                                           | App                                     |
|                      | 15 | <a href="http://mashable.com/2009/01/03/free-iphone-apps-to-lose-weight/">http://mashable.com/2009/01/03/free-iphone-apps-to-lose-weight/</a>                                                                               | App                                     |
|                      | 16 | <a href="http://www.geodistance.com/">http://www.geodistance.com/</a>                                                                                                                                                       | Other                                   |
|                      | 17 | <a href="https://itunes.apple.com/us/app/endomondo-sports-tracker-gps/id333210180?mt=8">https://itunes.apple.com/us/app/endomondo-sports-tracker-gps/id333210180?mt=8</a>                                                   | App                                     |
|                      | 18 | <a href="http://www.everythingicafe.com/forum/threads/tracking-your-running-walking-cycling-hiking-etc.31627/">http://www.everythingicafe.com/forum/threads/tracking-your-running-walking-cycling-hiking-etc.31627/</a>     | App                                     |
|                      | 19 | <a href="http://www.iphoneincanada.ca/app-store/starbucks-app-pick-of-the-week-walk-tracker-pro/">http://www.iphoneincanada.ca/app-store/starbucks-app-pick-of-the-week-walk-tracker-pro/</a>                               | App                                     |
|                      | 20 | <a href="http://www.bodyandsoul.com.au/health+healing/news+features/top+50+health+apps16209">http://www.bodyandsoul.com.au/health+healing/news+features/top+50+health+apps16209</a>                                         | Other                                   |
|                      | 21 | <a href="http://www.topiphoneapplication.com/walking-distance-tracking-app/">http://www.topiphoneapplication.com/walking-distance-tracking-app/</a>                                                                         | App                                     |
|                      | 22 | <a href="http://startwalkingnow.org/mystart_tracker.jsp">http://startwalkingnow.org/mystart_tracker.jsp</a>                                                                                                                 | Physical activity Online Health program |
|                      | 23 | <a href="http://howto.cnet.com/8301-11310_39-57349556-285/five-fitness-tracking-apps-for-android/">http://howto.cnet.com/8301-11310_39-57349556-285/five-fitness-tracking-apps-for-android/</a>                             | App                                     |
|                      | 24 | <a href="http://www.outsideonline.com/fitness/Hit-the-Road-app.html">http://www.outsideonline.com/fitness/Hit-the-Road-app.html</a>                                                                                         | App                                     |
|                      | 25 | <a href="http://pathtracks.com/">http://pathtracks.com/</a>                                                                                                                                                                 | App                                     |
|                      | 26 | <a href="http://www.facebook.com/walkertracker">http://www.facebook.com/walkertracker</a>                                                                                                                                   | Profile page                            |
|                      | 27 | <a href="https://itunes.apple.com/us/app/walk-tracker-gps-fitness-">https://itunes.apple.com/us/app/walk-tracker-gps-fitness-</a>                                                                                           | App                                     |

|  |    |                                                                                                                                                                                       |       |
|--|----|---------------------------------------------------------------------------------------------------------------------------------------------------------------------------------------|-------|
|  |    | <a href="http://tracker.dailyburn.com/workout_programs/73233">tracker/id453030204?mt=8</a>                                                                                            |       |
|  | 28 | <a href="http://tracker.dailyburn.com/workout_programs/73233">http://tracker.dailyburn.com/workout_programs/73233</a>                                                                 | App   |
|  | 29 | <a href="http://www.everytrail.com/iphone.php">http://www.everytrail.com/iphone.php</a>                                                                                               | App   |
|  | 30 | <a href="http://slickdeals.net/f/4789612-Starbucks-App-Codes-Walk-Tracker-Pro-Cat-In-The-Hat">http://slickdeals.net/f/4789612-Starbucks-App-Codes-Walk-Tracker-Pro-Cat-In-The-Hat</a> | Other |

|                          |    |                                                                                                                                                                                                                                                     |                                         |
|--------------------------|----|-----------------------------------------------------------------------------------------------------------------------------------------------------------------------------------------------------------------------------------------------------|-----------------------------------------|
| Walking distance tracker | 1  | <a href="http://www.geodistance.com/">http://www.geodistance.com/</a>                                                                                                                                                                               | Other                                   |
|                          | 2  | <a href="http://www.gmap-pedometer.com/">http://www.gmap-pedometer.com/</a>                                                                                                                                                                         | Other                                   |
|                          | 3  | <a href="http://www.mapmywalk.com/">http://www.mapmywalk.com/</a>                                                                                                                                                                                   | Physical activity Online Health program |
|                          | 4  | <a href="https://itunes.apple.com/us/app/mapmywalk-gps-walking/id307861492?mt=8">https://itunes.apple.com/us/app/mapmywalk-gps-walking/id307861492?mt=8</a>                                                                                         | App                                     |
|                          | 5  | <a href="http://www.jogtracker.com/">http://www.jogtracker.com/</a>                                                                                                                                                                                 | App                                     |
|                          | 6  | <a href="http://walking.about.com/library/walk/blgooglemap1.htm">http://walking.about.com/library/walk/blgooglemap1.htm</a>                                                                                                                         | App                                     |
|                          | 7  | <a href="http://www.walkjogrun.net/">http://www.walkjogrun.net/</a>                                                                                                                                                                                 | Physical activity Online Health program |
|                          | 8  | <a href="http://www.abvio.com/walkmeter/">http://www.abvio.com/walkmeter/</a>                                                                                                                                                                       | App                                     |
|                          | 9  | <a href="https://play.google.com/store/apps/details?id=com.endomondo.android&amp;hl=en">https://play.google.com/store/apps/details?id=com.endomondo.android&amp;hl=en</a>                                                                           | App                                     |
|                          | 10 | <a href="http://www.topiphoneapplication.com/walking-distance-tracking-app/">http://www.topiphoneapplication.com/walking-distance-tracking-app/</a>                                                                                                 | App                                     |
|                          | 11 | <a href="https://play.google.com/store/apps/details?id=com.fitnesskeeper.runkeeper.pro&amp;hl=en">https://play.google.com/store/apps/details?id=com.fitnesskeeper.runkeeper.pro&amp;hl=en</a>                                                       | App                                     |
|                          | 12 | <a href="http://startwalkingnow.org/mystart_tracker.jsp">http://startwalkingnow.org/mystart_tracker.jsp</a>                                                                                                                                         | Physical activity Online Health program |
|                          | 13 | <a href="http://mashable.com/2010/02/23/iphone-apps-runners/">http://mashable.com/2010/02/23/iphone-apps-runners/</a>                                                                                                                               | Links to Online Health Program          |
|                          | 14 | <a href="http://tracker.dailyburn.com/workout_programs/73233">http://tracker.dailyburn.com/workout_programs/73233</a>                                                                                                                               | Physical activity Online Health program |
|                          | 15 | <a href="http://downloads.yahoo.com/software/mobile-iphone-walking-distance-meter-s550713">http://downloads.yahoo.com/software/mobile-iphone-walking-distance-meter-s550713</a>                                                                     | App                                     |
|                          | 16 | <a href="http://walking.about.com/cs/measure/a/blhowtrack.htm">http://walking.about.com/cs/measure/a/blhowtrack.htm</a>                                                                                                                             | Links to Online Health Program          |
|                          | 17 | <a href="http://www.droidforums.net/forum/droid-incredible-general-discussions/42544-there-app-tracks-miles-i-walk-run.html">http://www.droidforums.net/forum/droid-incredible-general-discussions/42544-there-app-tracks-miles-i-walk-run.html</a> | Links to Online Health Program          |
|                          | 18 | <a href="http://www.rei.com/learn/expert-advice/fitness-monitors.html">http://www.rei.com/learn/expert-advice/fitness-monitors.html</a>                                                                                                             | Other                                   |
|                          | 19 | <a href="http://www.everythingicafe.com/forum/threads/tracking-your-running-walking-cycling-hiking-etc.31627/">http://www.everythingicafe.com/forum/threads/tracking-your-running-walking-cycling-hiking-etc.31627/</a>                             | Links to Online Health Program          |
|                          | 20 | <a href="http://www.amazon.com/GOsmart-Pace-Distance-Tracker-Pedometers/dp/B0055QHM14">http://www.amazon.com/GOsmart-Pace-Distance-Tracker-Pedometers/dp/B0055QHM14</a>                                                                             | Other                                   |
|                          | 21 | <a href="http://tracker.dailyburn.com/forums/fitness_and_exercise/topics/calculate_walking_distance_with_google_maps">http://tracker.dailyburn.com/forums/fitness_and_exercise/topics/calculate_walking_distance_with_google_maps</a>               | Links to Online Health Program          |
|                          | 22 | <a href="http://www.brighthub.com/mobile/blackberry-platform/articles/96496.aspx">http://www.brighthub.com/mobile/blackberry-platform/articles/96496.aspx</a>                                                                                       | Links to Online Health Program          |
|                          | 23 | <a href="http://androidforums.com/htc-hero/37495-looking-accurate-walking-gps-tracker.html">http://androidforums.com/htc-hero/37495-looking-accurate-walking-gps-tracker.html</a>                                                                   | Links to Online Health Program          |
|                          | 24 | <a href="http://uk.ask.com/beauty/Walking-Distance-Tracker">http://uk.ask.com/beauty/Walking-Distance-Tracker</a>                                                                                                                                   | Other                                   |

|  |    |                                                                                                                                                                                               |                        |
|--|----|-----------------------------------------------------------------------------------------------------------------------------------------------------------------------------------------------|------------------------|
|  | 25 | <a href="http://www.androidcentral.com/google-slips-walking-and-cycling-tracking-card-google-now">http://www.androidcentral.com/google-slips-walking-and-cycling-tracking-card-google-now</a> | App                    |
|  | 26 | <a href="http://walking.about.com/od/maps/tp/Best-Walking-App-Readers-Choice-Awards-2012.htm">http://walking.about.com/od/maps/tp/Best-Walking-App-Readers-Choice-Awards-2012.htm</a>         | App                    |
|  | 27 | <a href="http://www.androidguys.com/2012/09/07/five-for-friday-android-apps-for-tracking-a-run/">http://www.androidguys.com/2012/09/07/five-for-friday-android-apps-for-tracking-a-run/</a>   | App                    |
|  | 28 | <a href="http://www.topappcharts.com/433415717/app-details-walking-distance-meter.php">http://www.topappcharts.com/433415717/app-details-walking-distance-meter.php</a>                       | App                    |
|  | 29 | <a href="http://www.livestrong.com/article/241650-calculate-walking-calories-by-distance/">http://www.livestrong.com/article/241650-calculate-walking-calories-by-distance/</a>               | NGO health information |
|  | 30 | <a href="http://www.vertex42.com/ExcelTemplates/running-log.html">http://www.vertex42.com/ExcelTemplates/running-log.html</a>                                                                 | Other                  |
